# Supplementary material for: 1-(1-Arylethylpiperidin-4-yl)thymine Analogs as Antimycobacterial TMPK Inhibitors
Source: PubMed Central journal article supplement (PMC7356956; doi:10.3390/molecules25122805), 2020-06-17
Supplement: molecules-25-02805-s001.pdf [file molecules-25-02805-s001.pdf]

Article

# 1-(1-Arylethylpiperidin-4-yl)thymine Analogs as Antimycobacterial TMPK Inhibitors

Yanlin Jian <sup>1</sup>, Fabian Hulpia <sup>1</sup>, Martijn D. P. Risseuw <sup>1</sup>, He Eun Forbes <sup>2</sup>, Guy Caljon <sup>3</sup>,  
Hélène Munier-Lehmann <sup>4</sup>, Helena I. M. Boshoff <sup>2</sup> and Serge Van Calenbergh <sup>1,\*</sup>

<sup>1</sup> Laboratory for Medicinal Chemistry (FFW), Ghent University, Ottergemsesteenweg 460, B-9000 Gent, Belgium; yanlin.jian@ugent.be (Y.J.); fabian.hulpia@ugent.be (F.H.); martijn.risseuw@ugent.be (M.D.P.R.)

<sup>2</sup> Tuberculosis Research Section, Laboratory of Clinical Immunology and Microbiology, National Institute of Allergy and Infectious Disease, National Institutes of Health, 9000 Rockville Pike, Bethesda, MD 20892, United States; grace.chun@nih.gov (H.E.F.); hboshoff@niaid.nih.gov (H.I.M.B.)

<sup>3</sup> Laboratory of Microbiology, Parasitology and Hygiene, University of Antwerp, Universiteitsplein 1 (S7), B-2610 Wilrijk, Belgium; Guy.Caljon@uantwerpen.be

<sup>4</sup> Unit of Chemistry and Biocatalysis, Department of Structural Biology and Chemistry, Institut Pasteur, CNRS UMR3523, 28 Rue du Dr. Roux, CEDEX 15 75724 Paris, France; helene.munier-lehmann@pasteur.fr

\* Correspondence: serge.vancalenbergh@ugent.be; Tel.: +32 9 264 81 24

Academic Editor: Athina Geronikaki

Received: 6 May 2020; Accepted: 14 June 2020; Published: 17 June 2020

## Table of contents:

Figure S1–S43– NMR spectra of final compounds

2-44

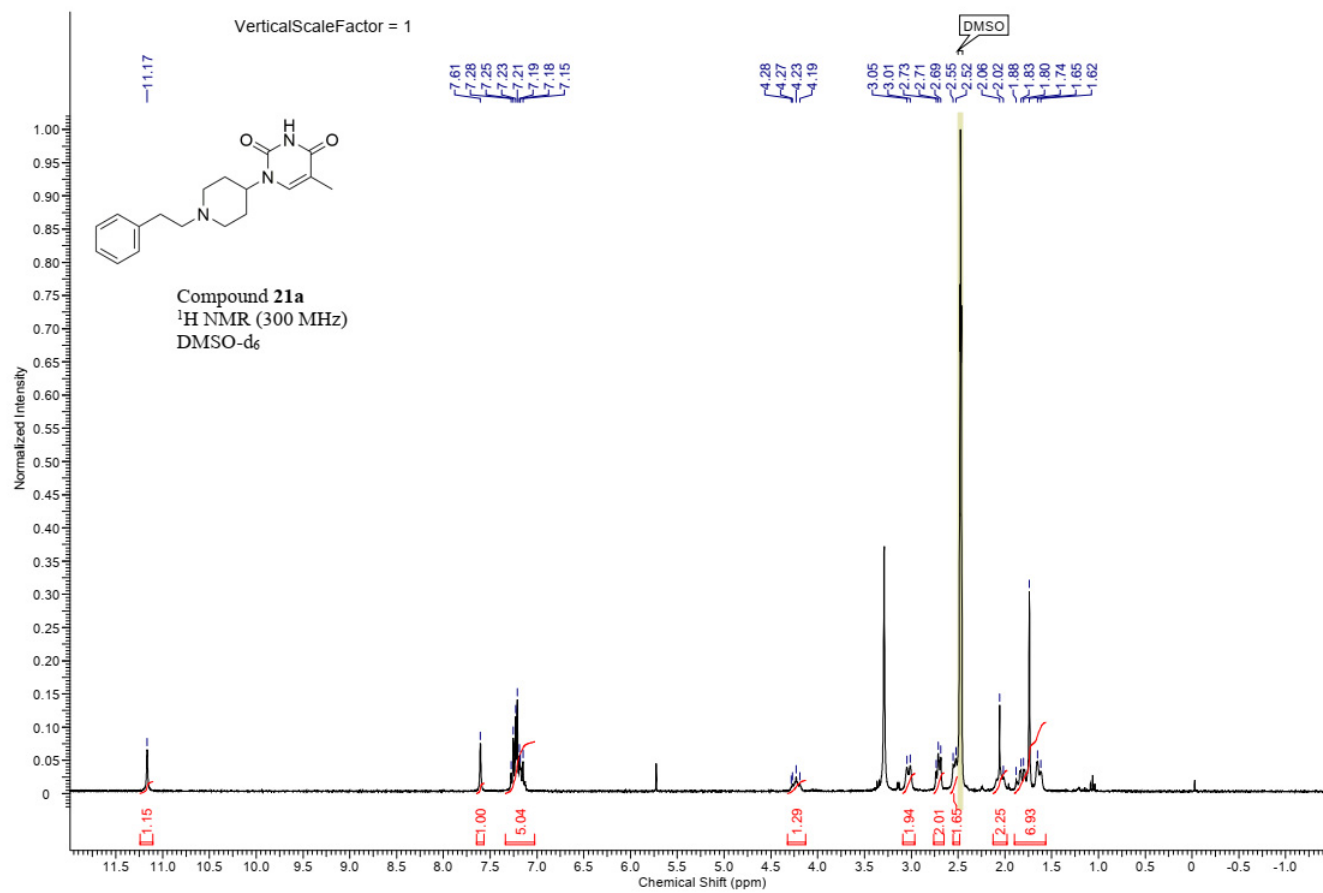Figure S1. <sup>1</sup>H NMR spectrum of compound 21a.

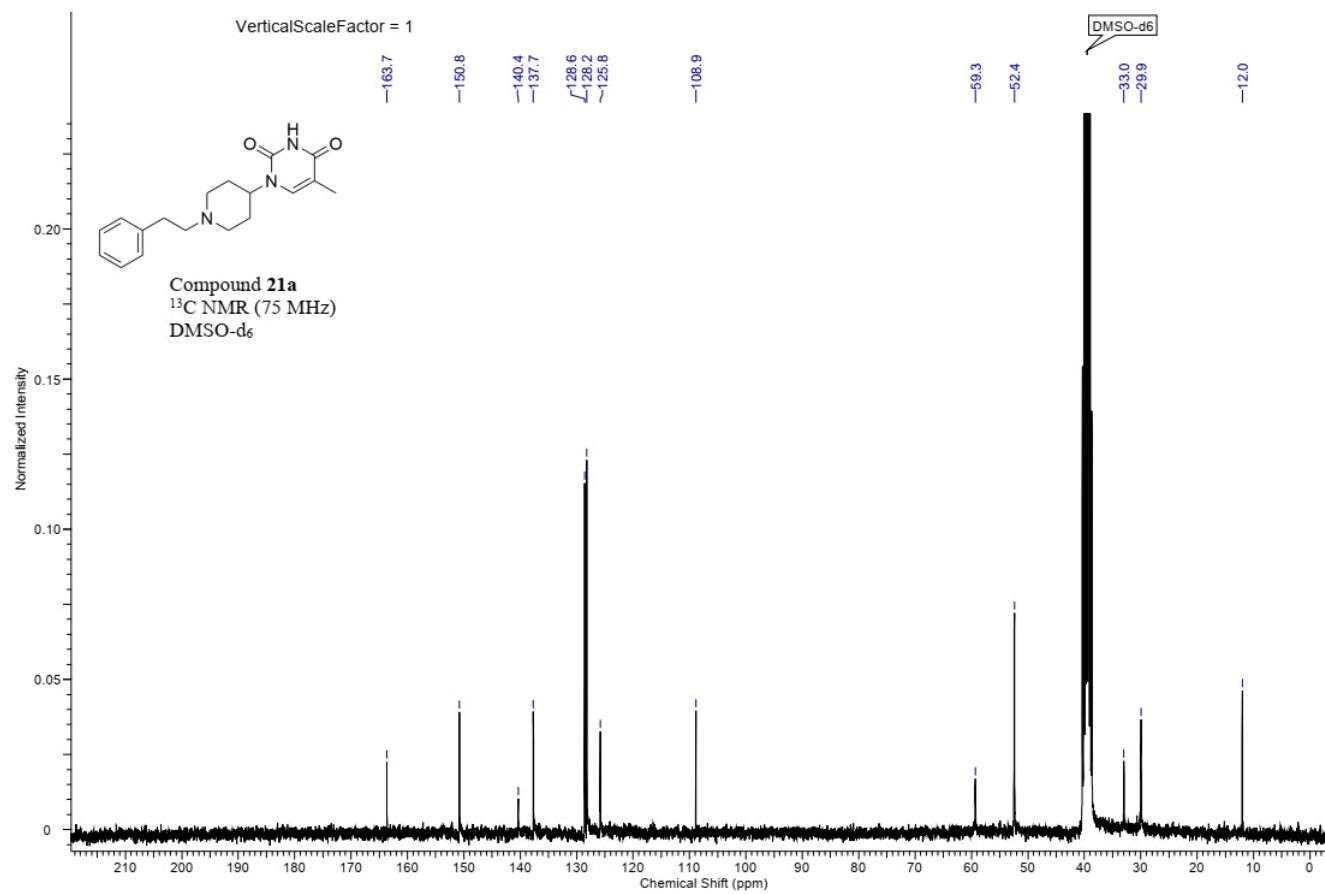

Figure S2. <sup>13</sup>C NMR spectrum of compound **21a**.

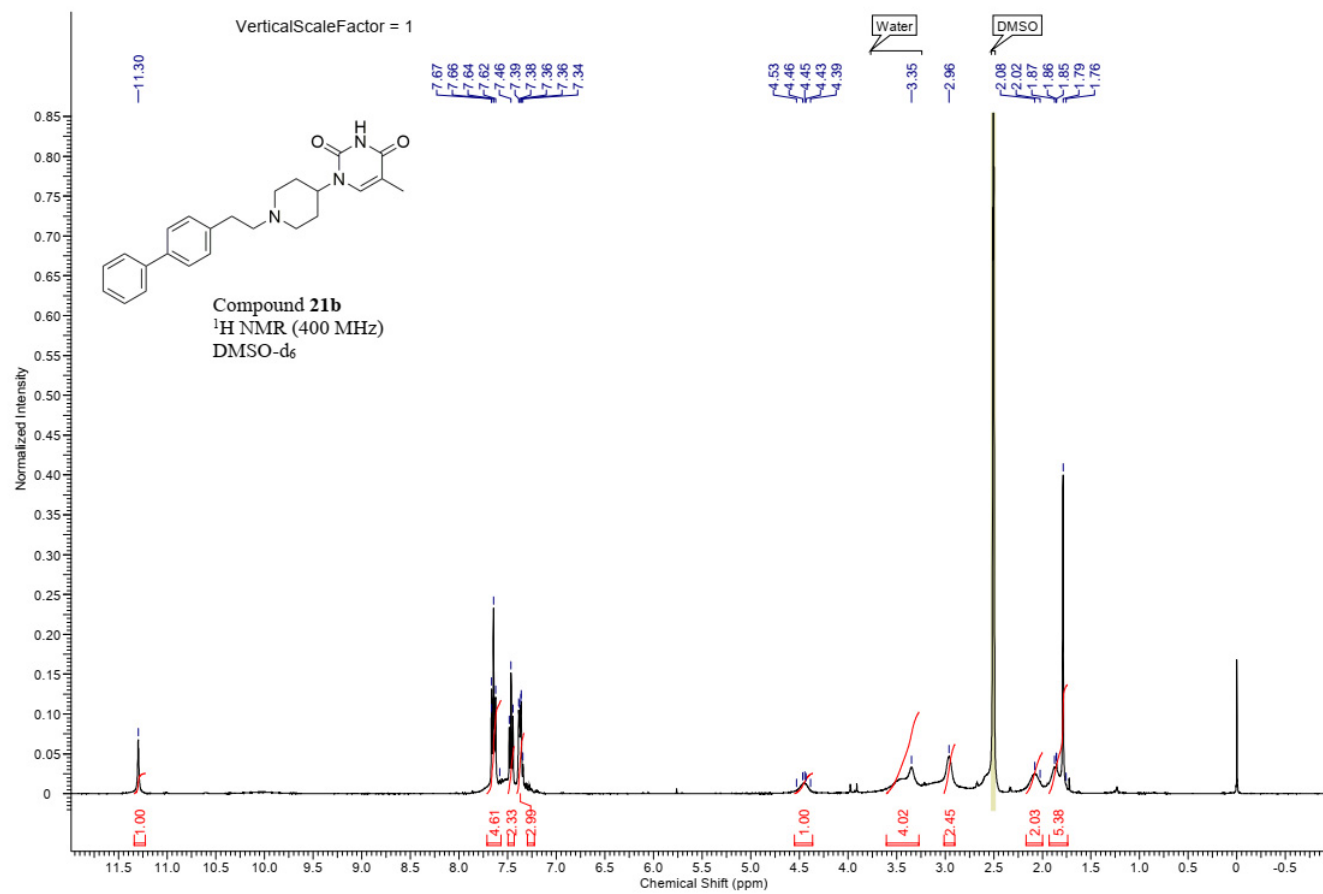Figure S3. <sup>1</sup>H NMR spectrum of compound **21b**.

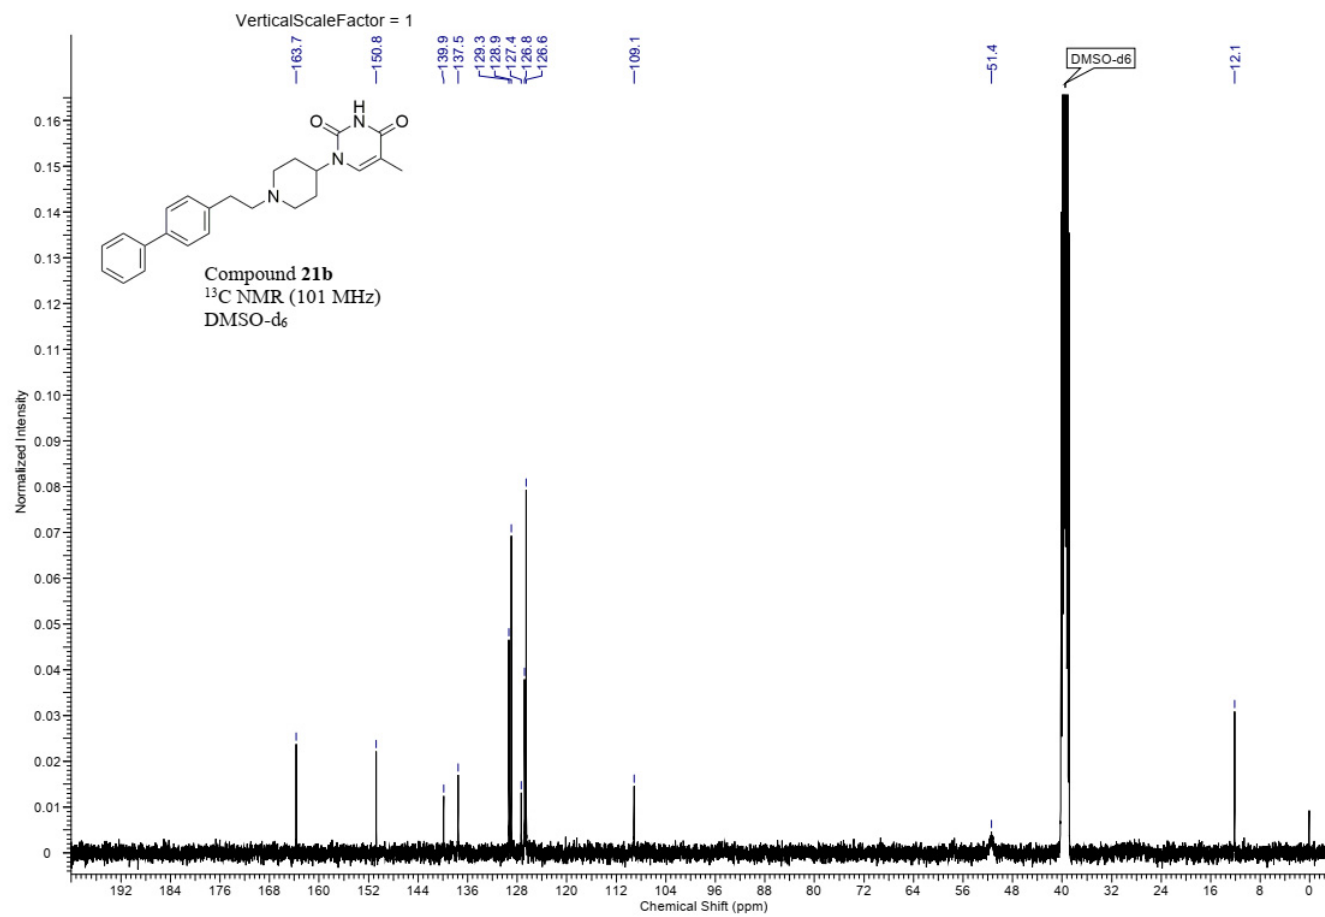

Figure S4. <sup>13</sup>C NMR spectrum of compound **21b**.

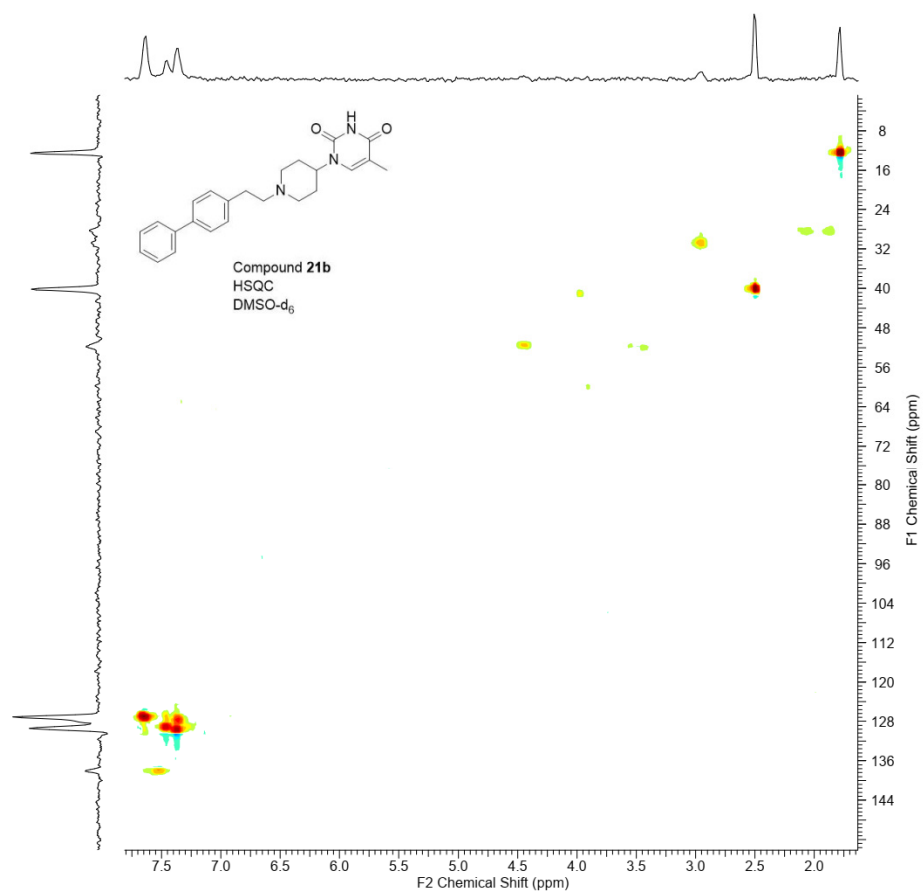

Figure S5. HSQC spectrum of compound 21b.

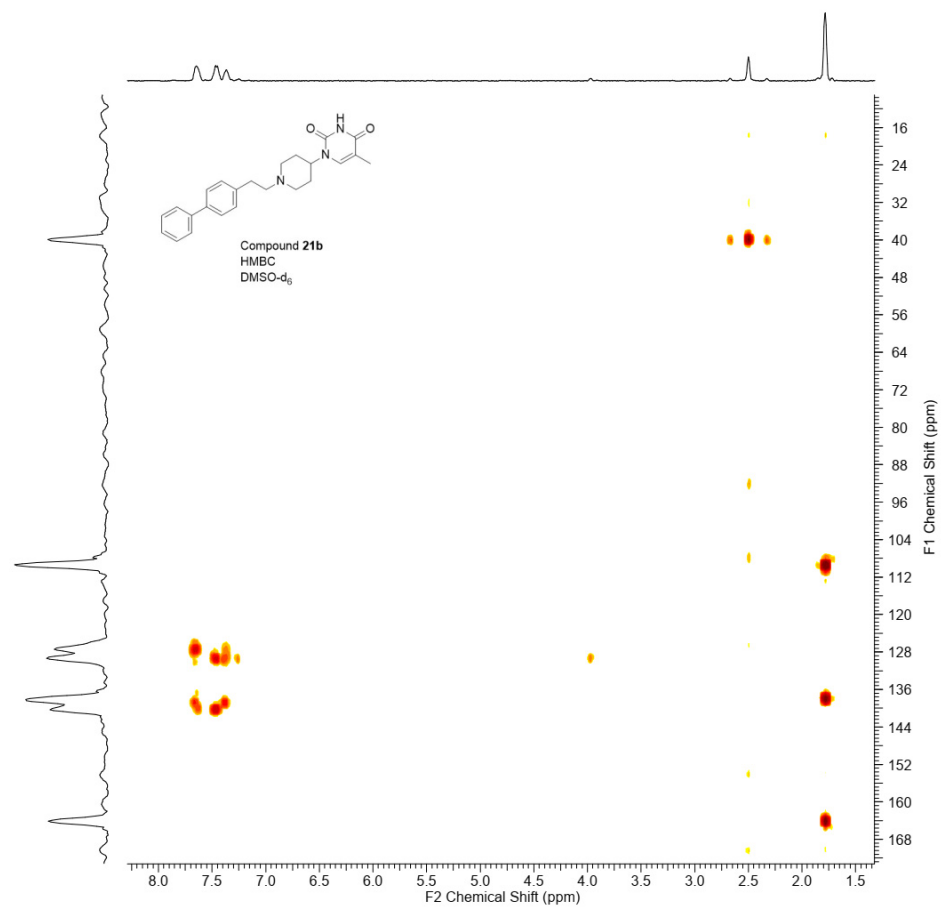

Figure S6. HMBC spectrum of compound 21b.

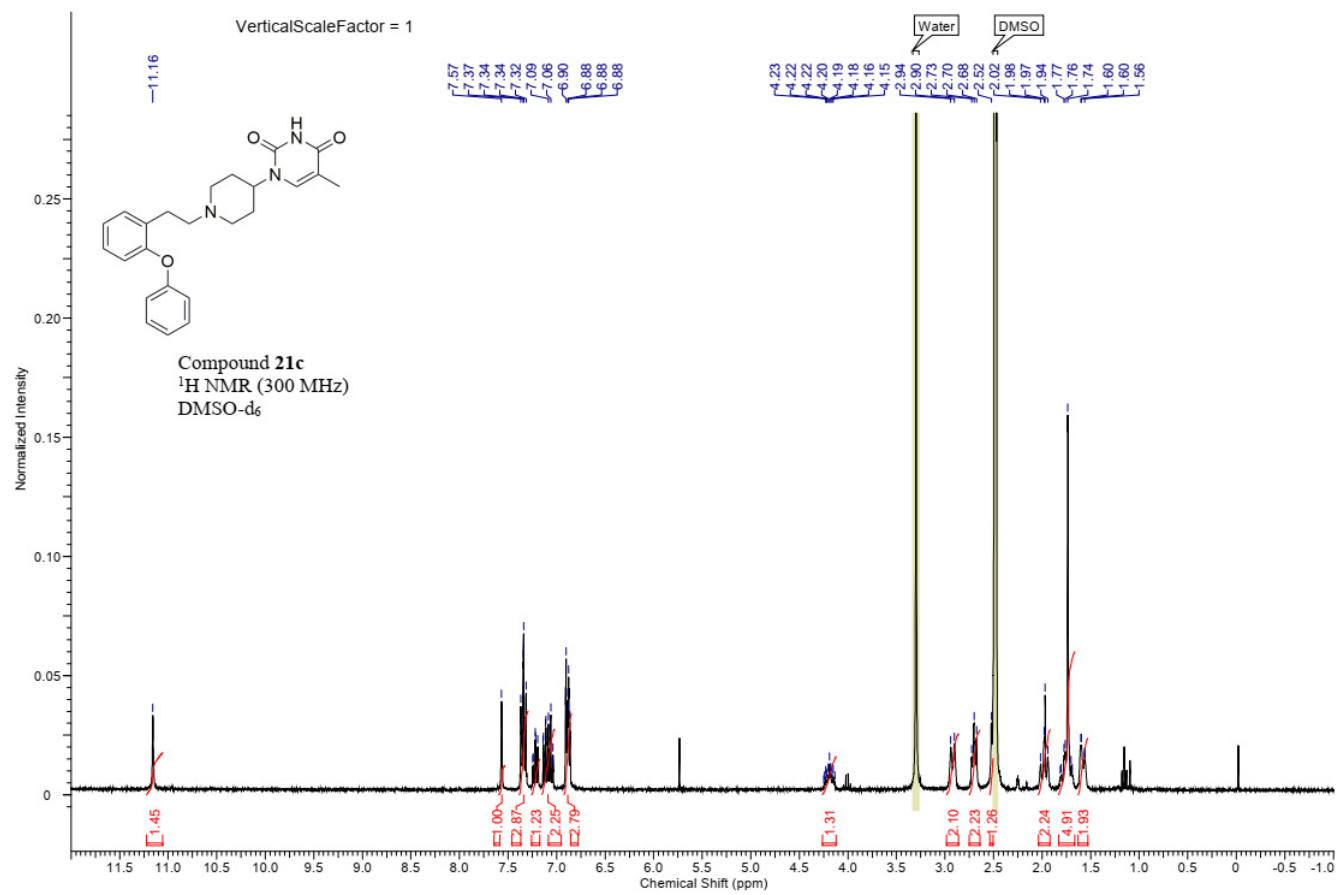Figure S7. <sup>1</sup>H NMR spectrum of compound 21c.



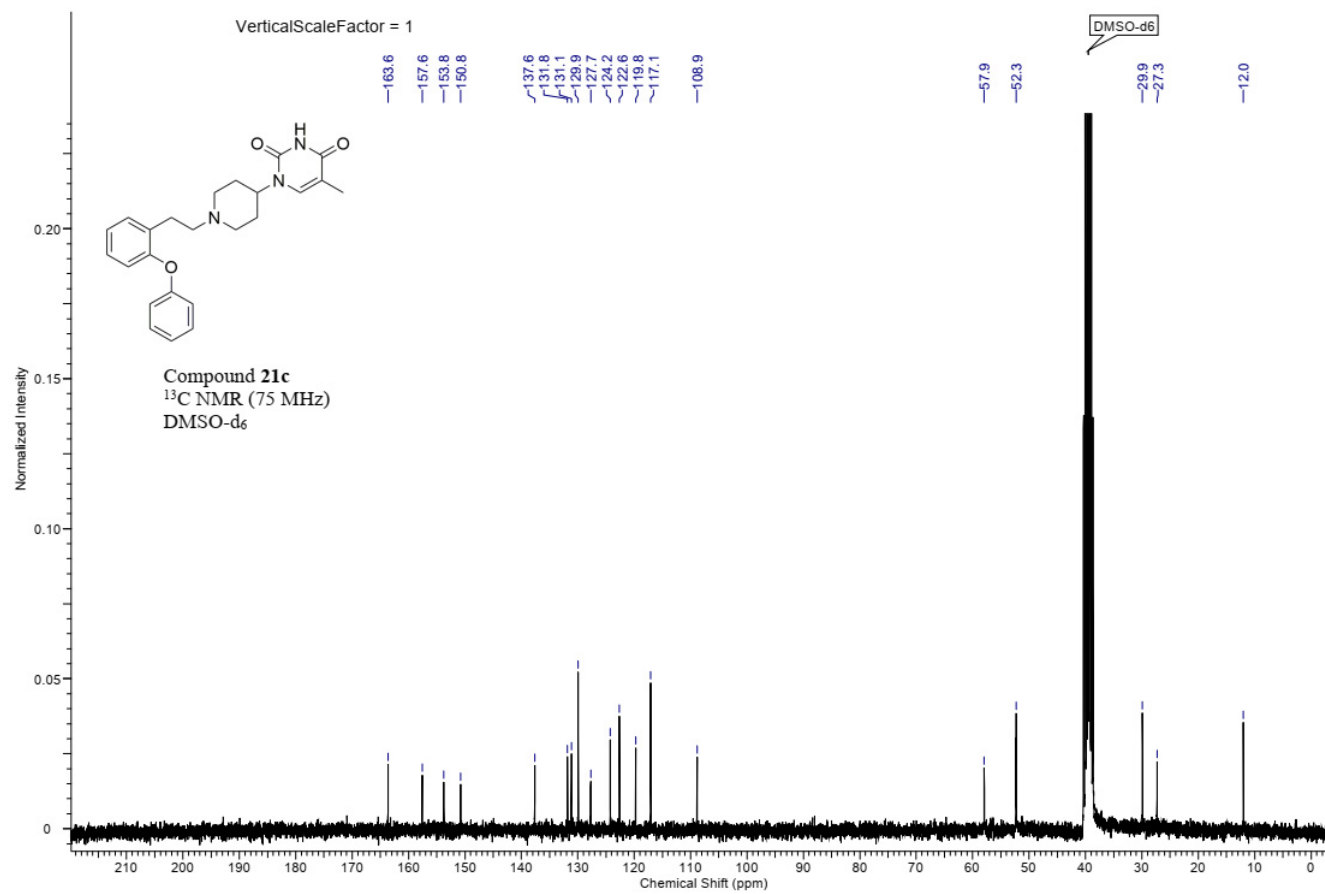Figure S8.  $^{13}\text{C}$  NMR spectrum of compound 21c.

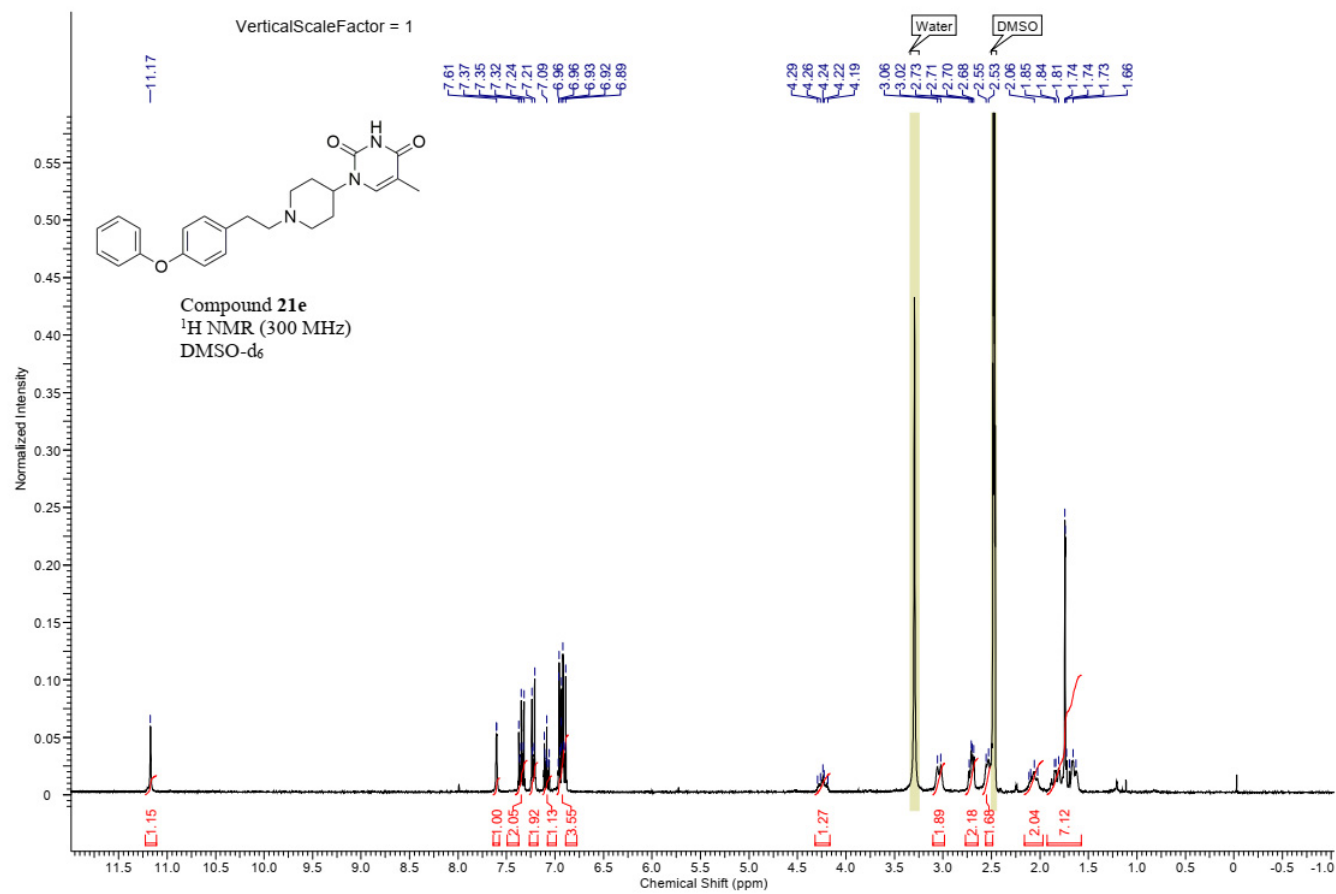Figure S9. <sup>1</sup>H NMR spectrum of compound **21e**.

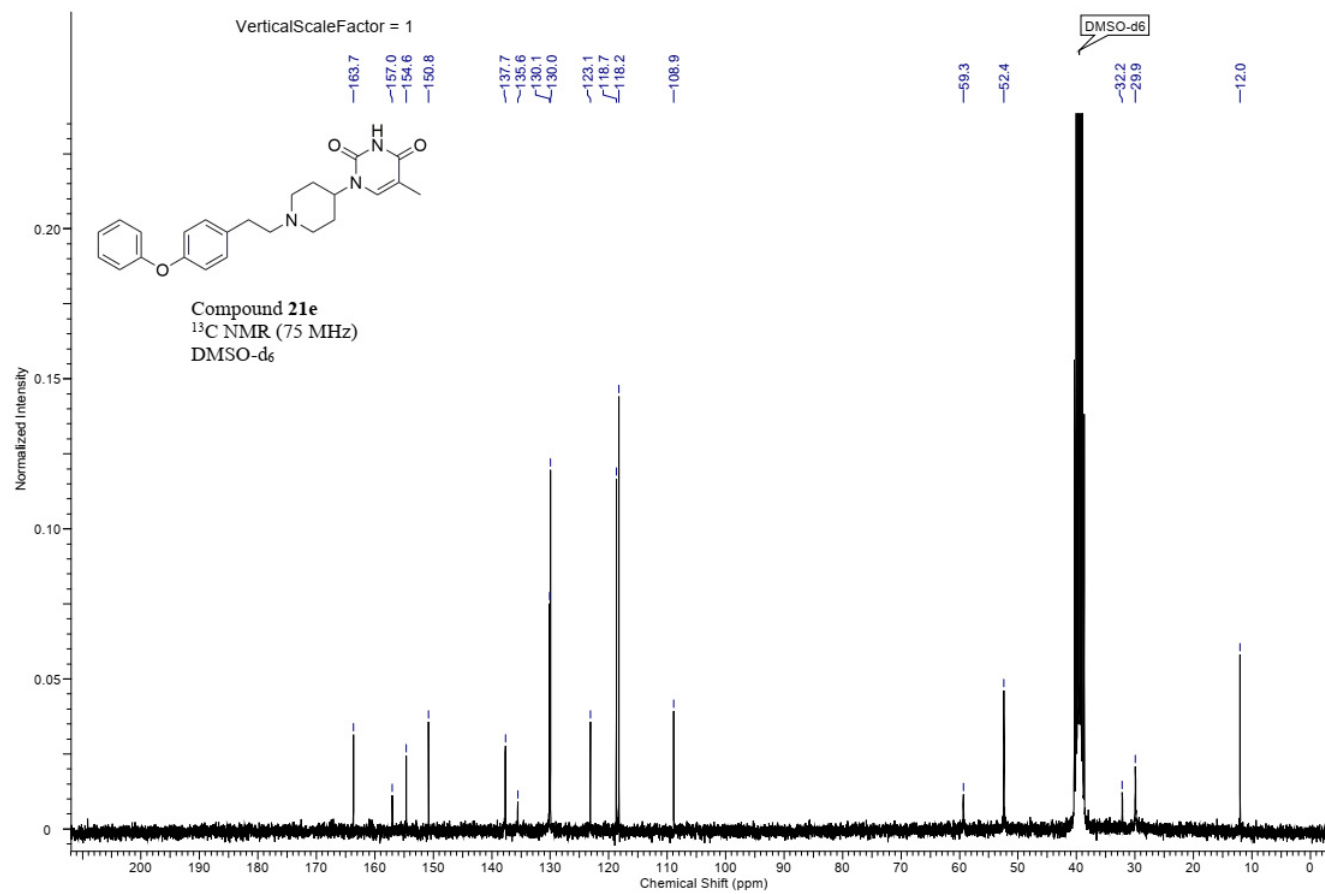Figure S10. <sup>13</sup>C NMR spectrum of compound **21e**.

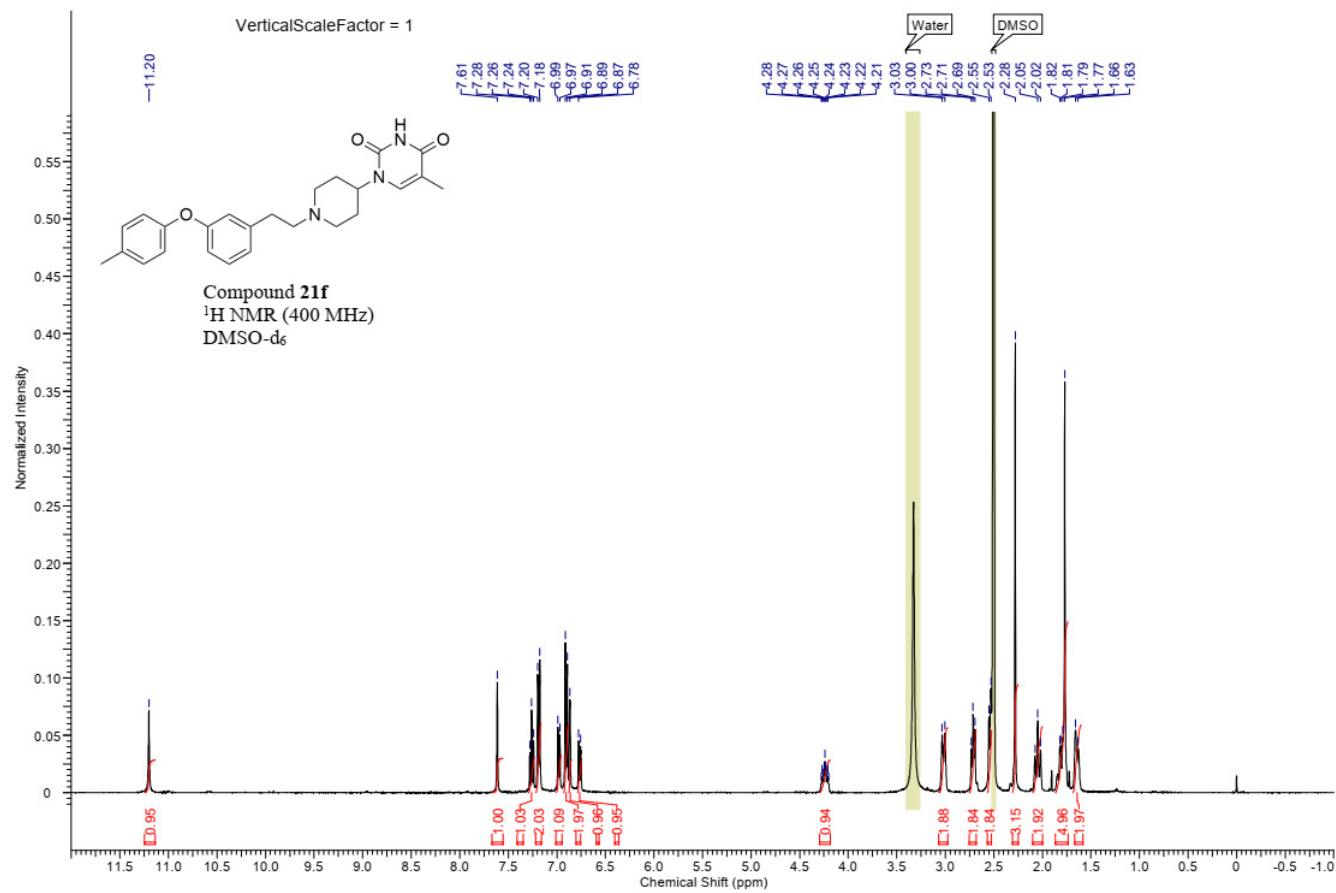Figure S11. <sup>1</sup>H NMR spectrum of compound 21f.

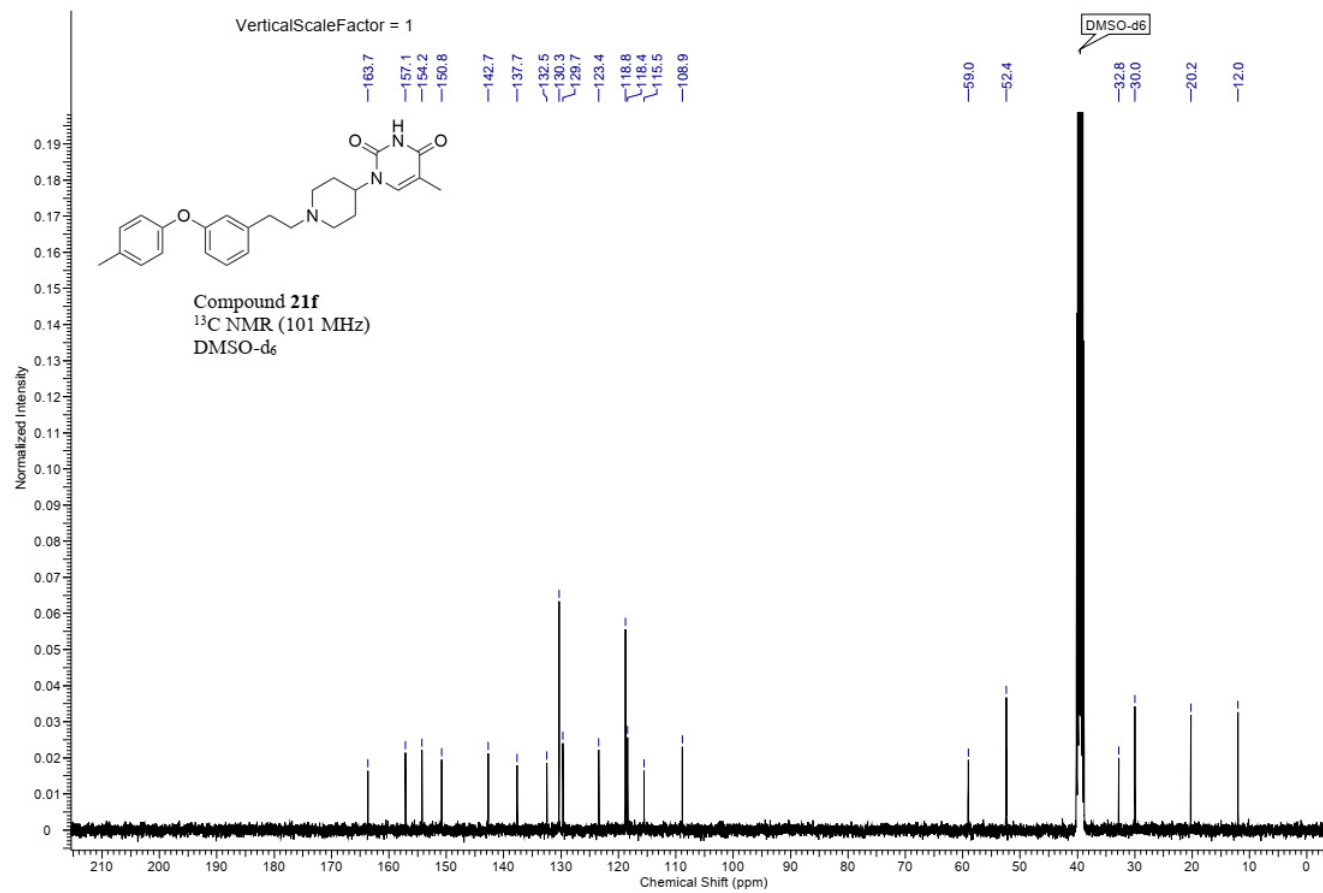

Figure S12.  $^{13}\text{C}$  NMR spectrum of compound **21f**.

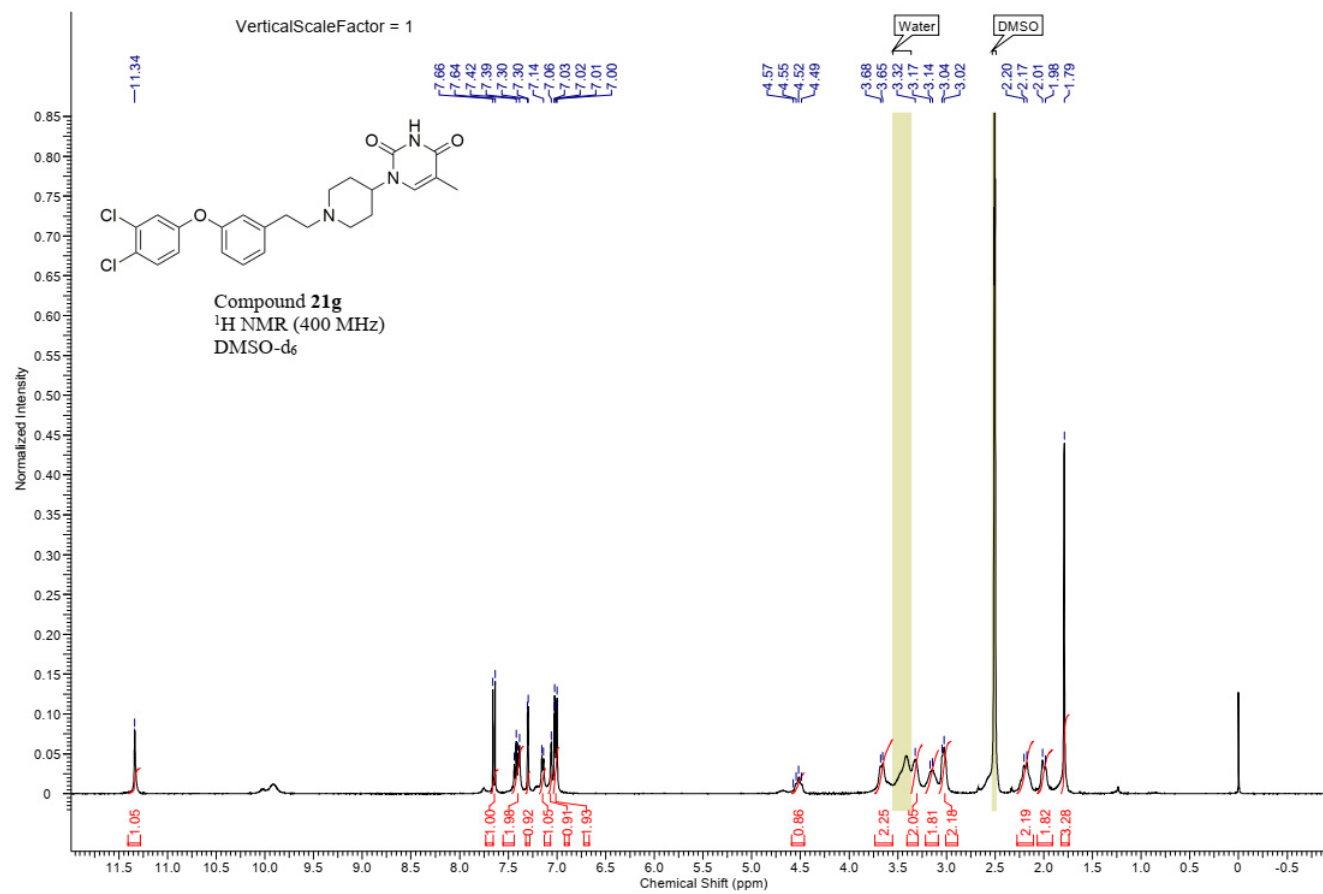Figure S13. <sup>1</sup>H NMR spectrum of compound 21g.

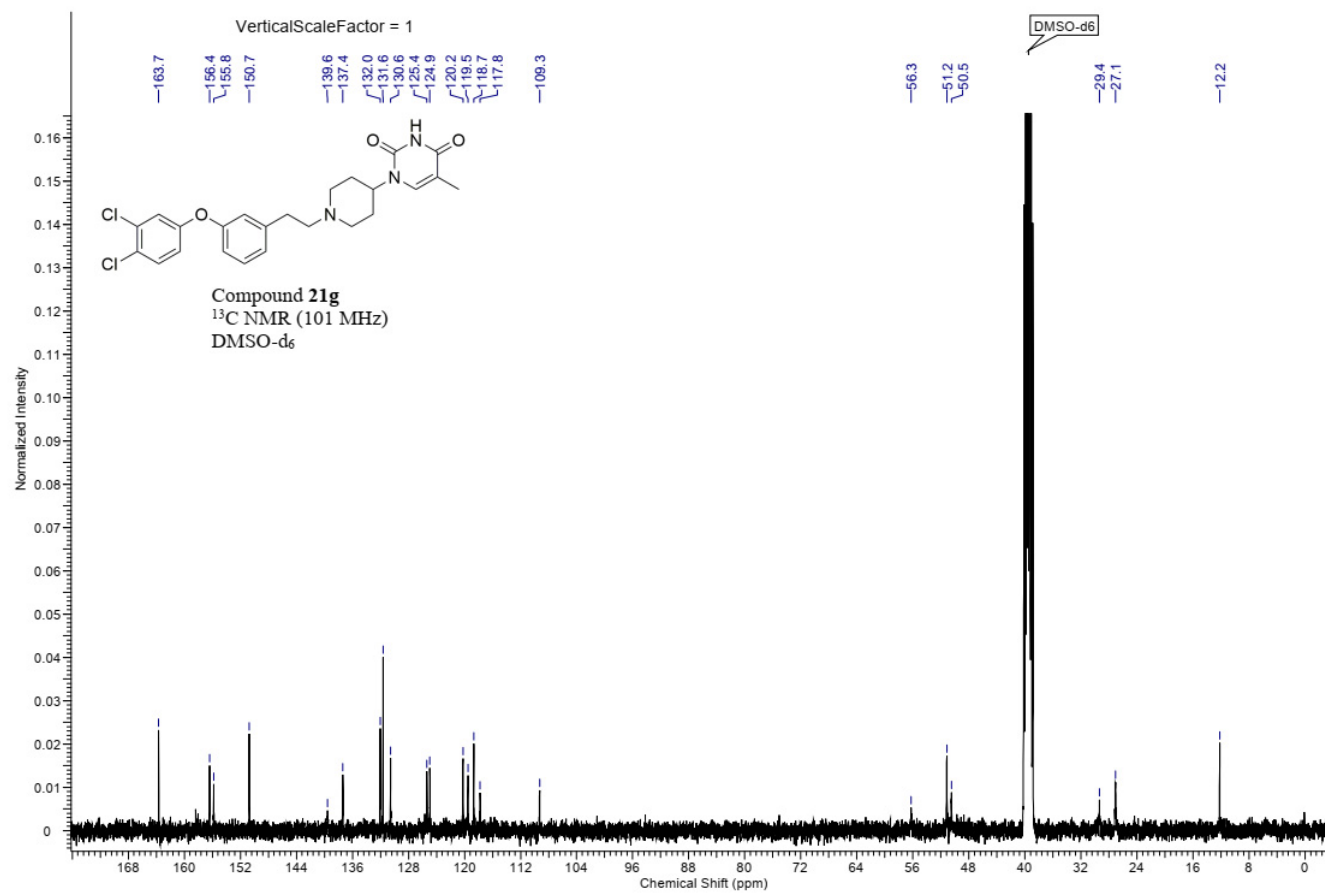

Figure S14.  $^{13}\text{C}$  NMR spectrum of compound **21g**.

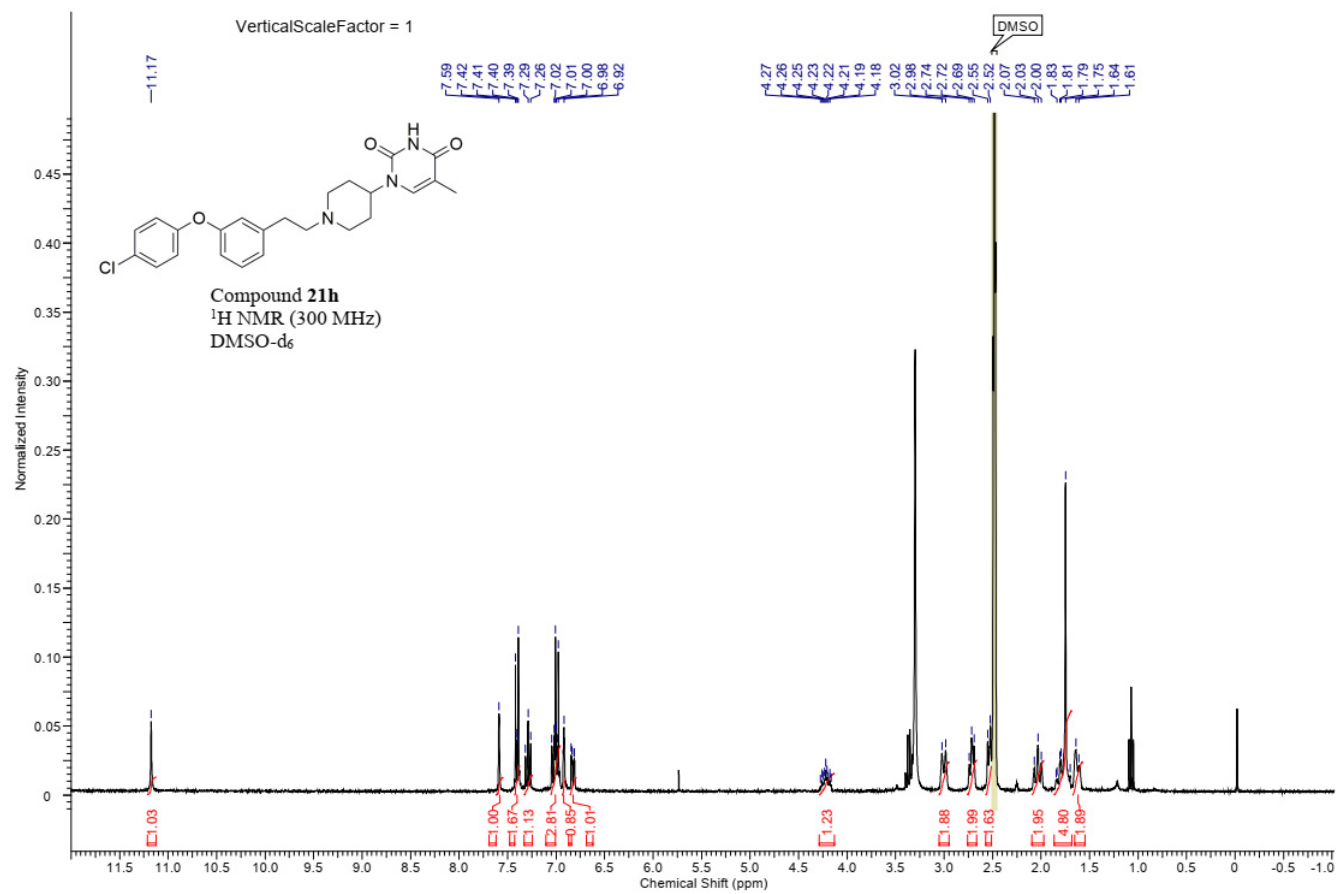Figure S15. <sup>1</sup>H NMR spectrum of compound 21h.



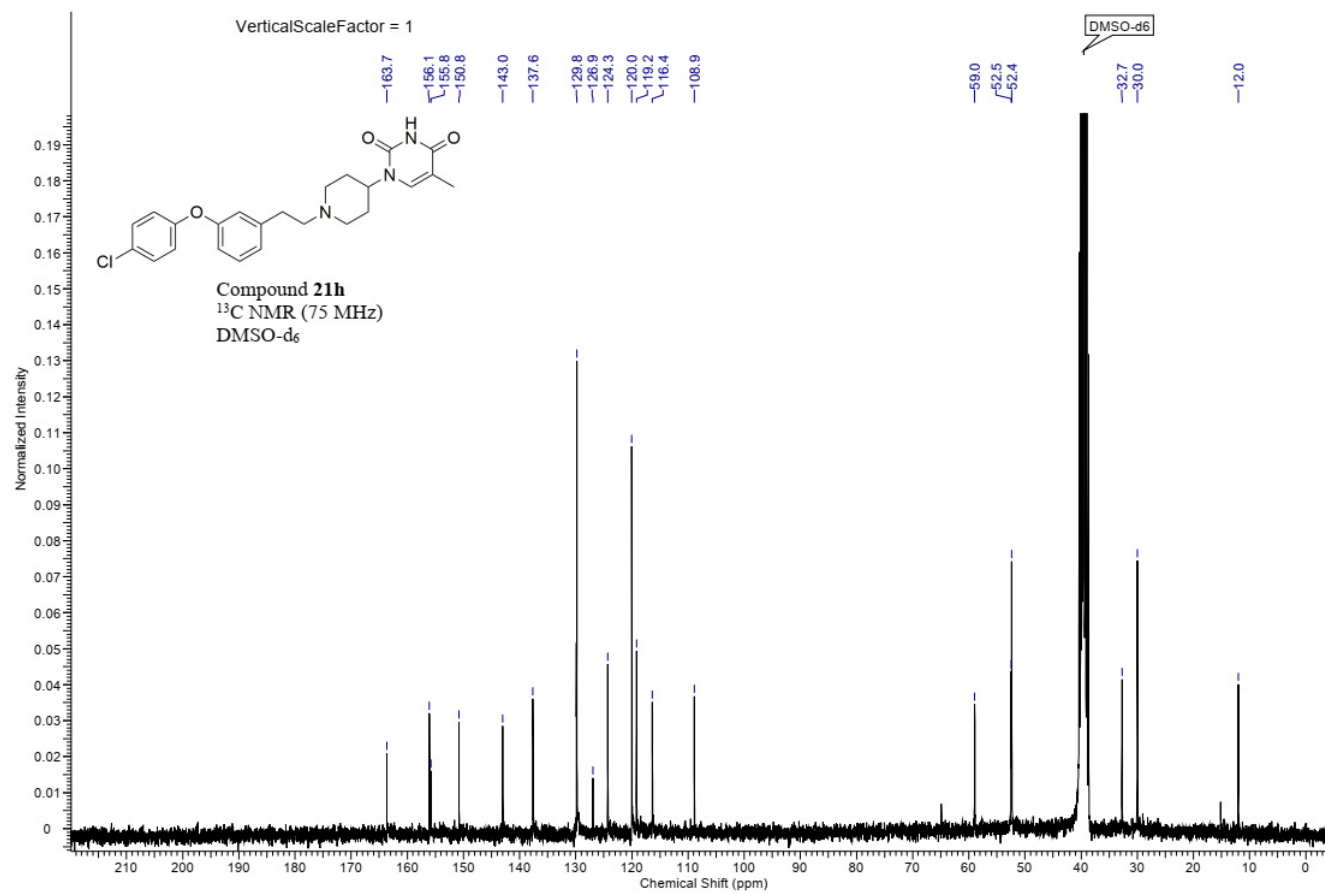

Figure S16.  $^{13}\text{C}$  NMR spectrum of compound **21h**.

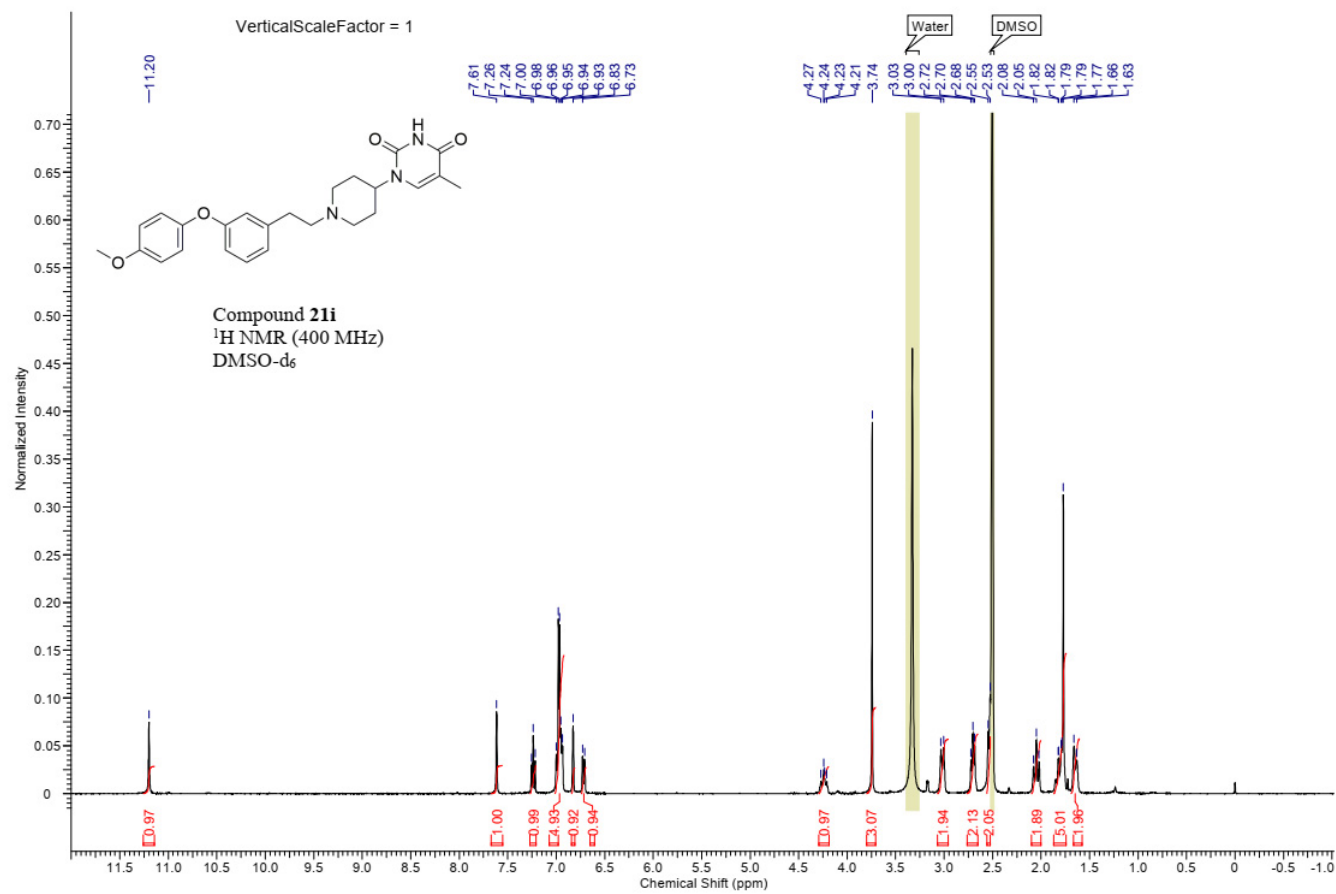Figure S17. <sup>1</sup>H NMR spectrum of compound **21i**.

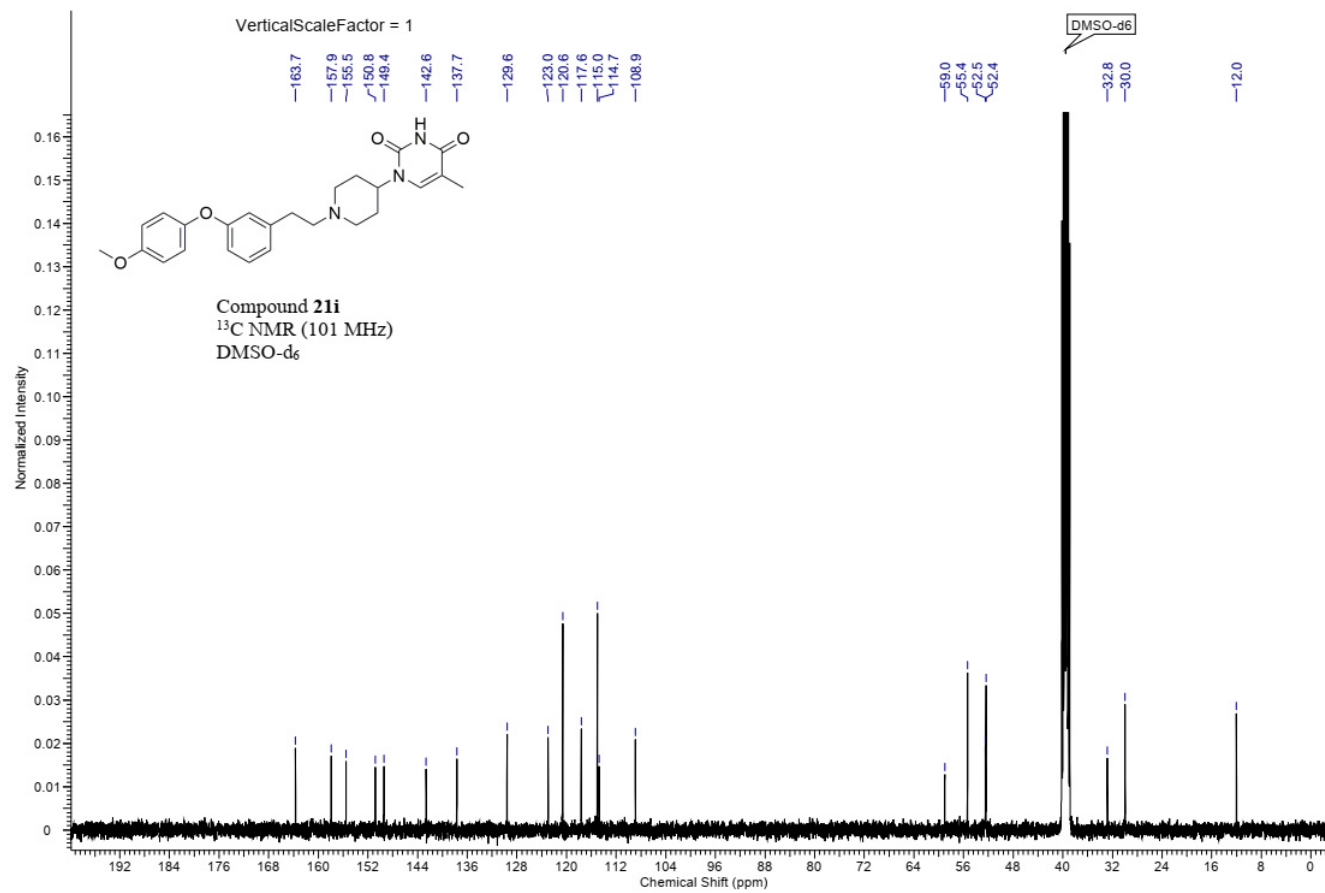

Figure S18. <sup>13</sup>C NMR spectrum of compound 21i.

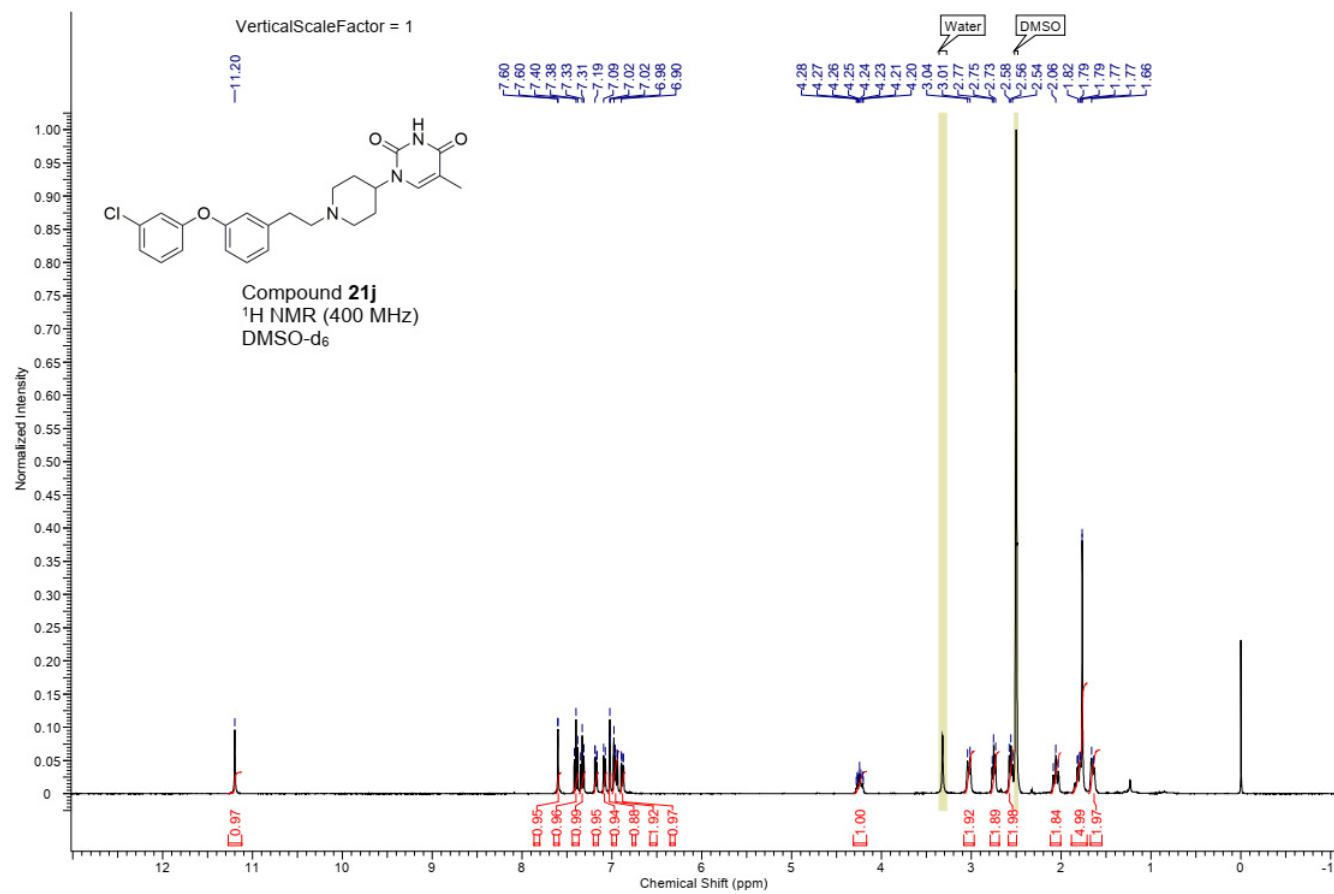Figure S19. <sup>1</sup>H NMR spectrum of compound **21j**.

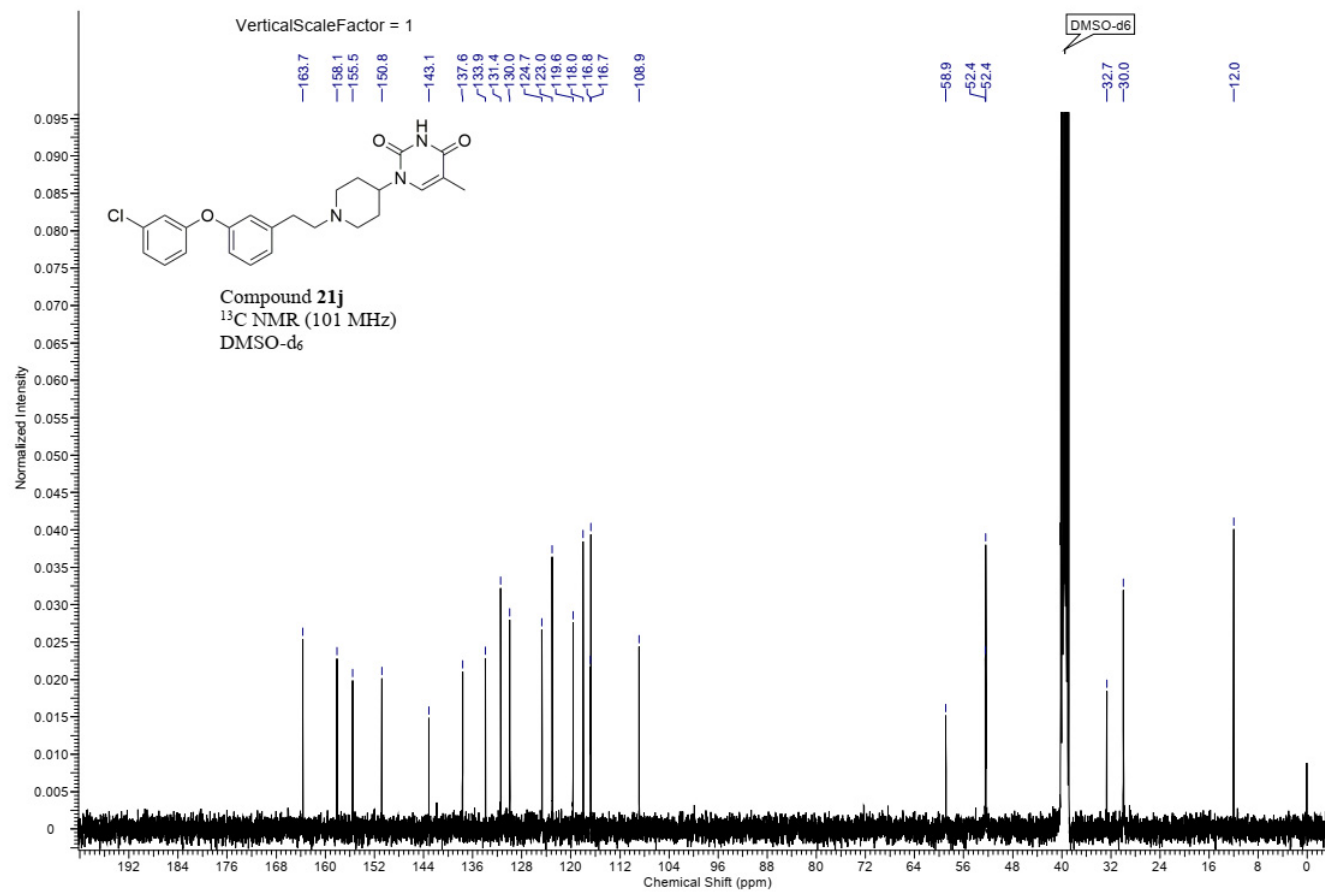

Figure S20.  $^{13}\text{C}$  NMR spectrum of compound 21j.

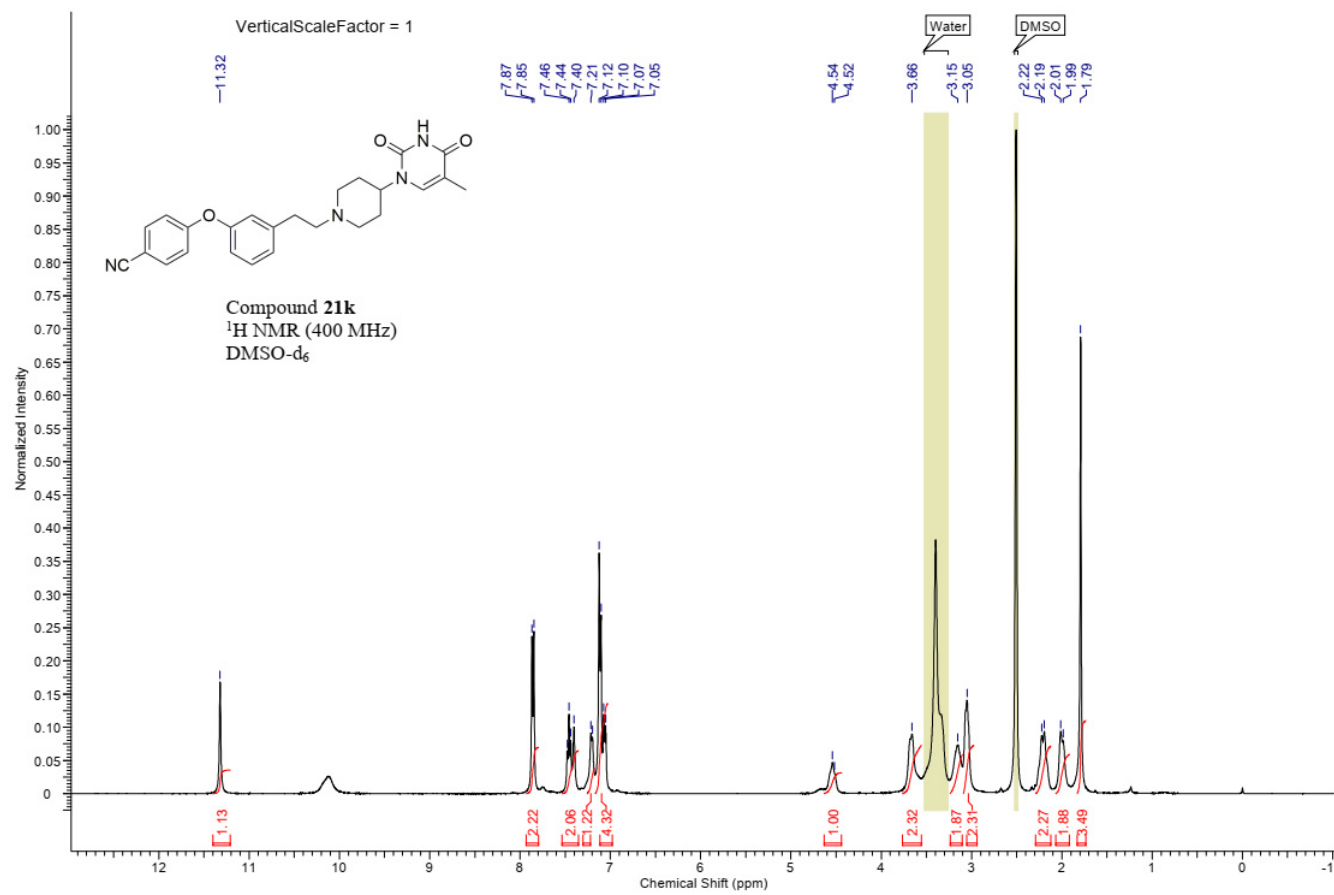Figure S21. <sup>1</sup>H NMR spectrum of compound **21k**.

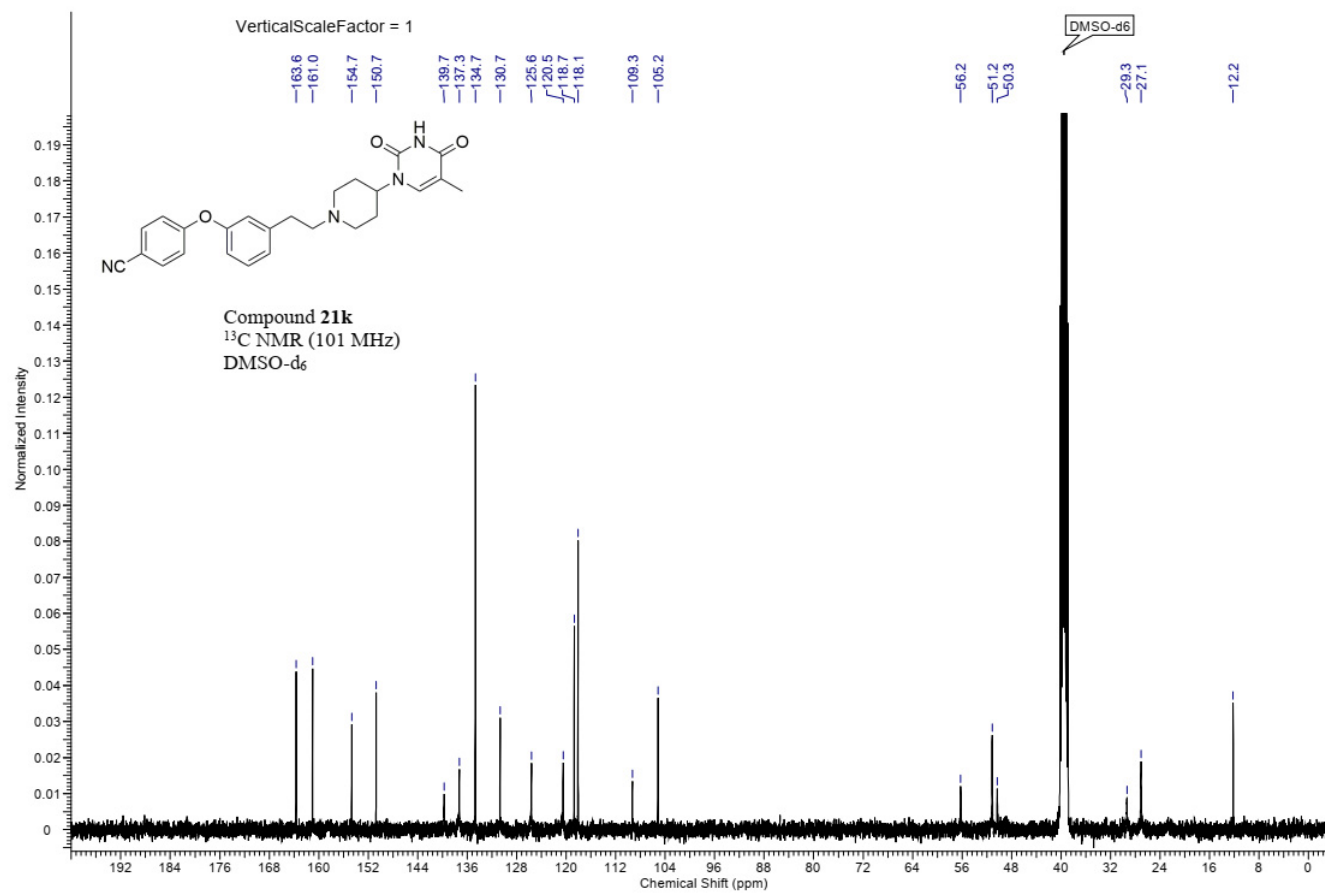

Figure S22.  $^{13}\text{C}$  NMR spectrum of compound **21k**.

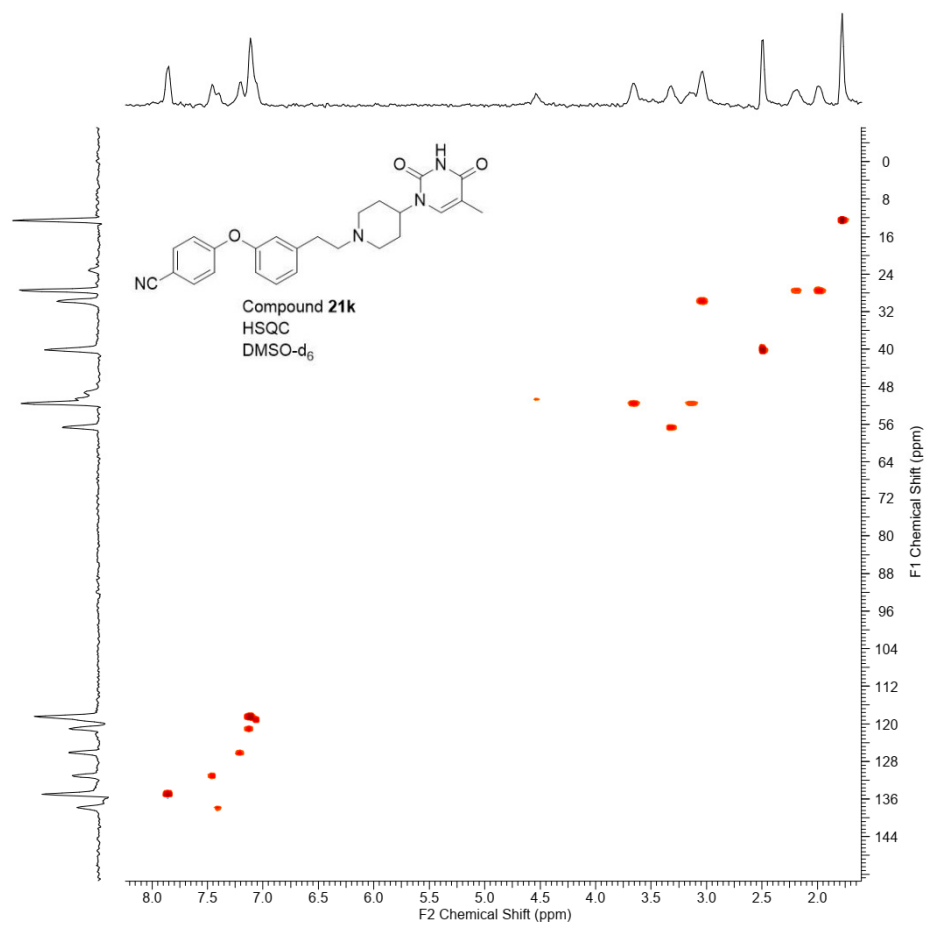

Figure S23. HSQC spectrum of compound 21k.



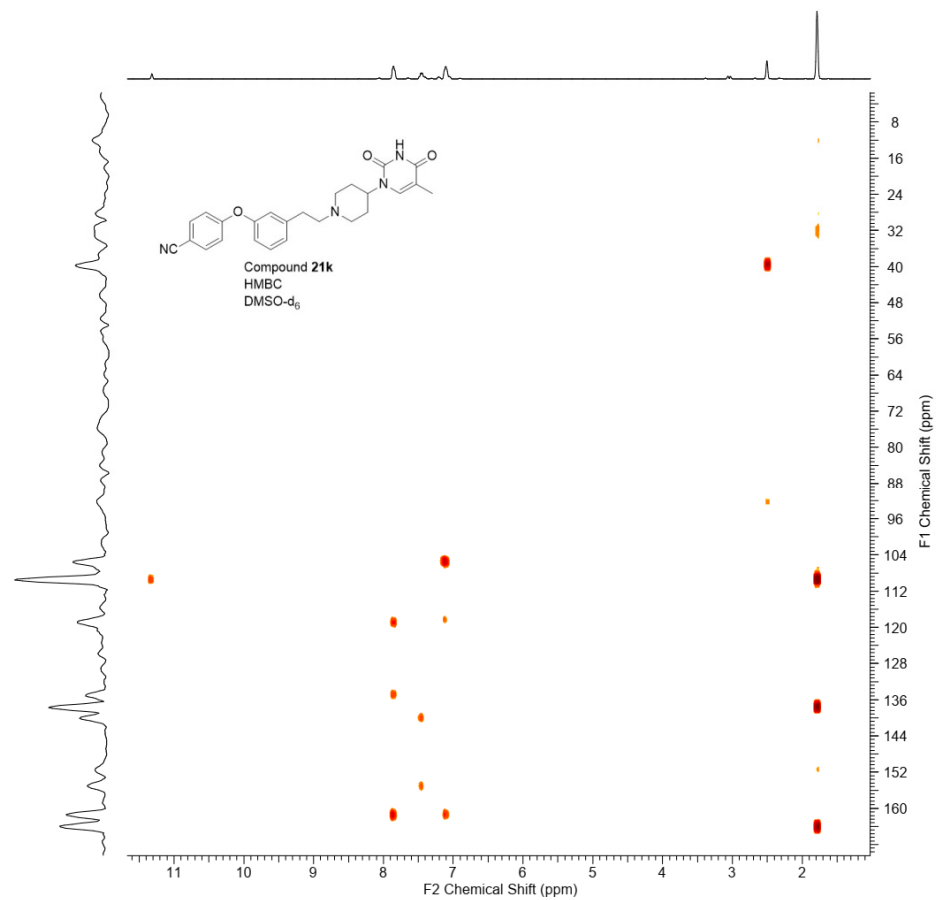

Figure S24. HMBC spectrum of compound 21k.

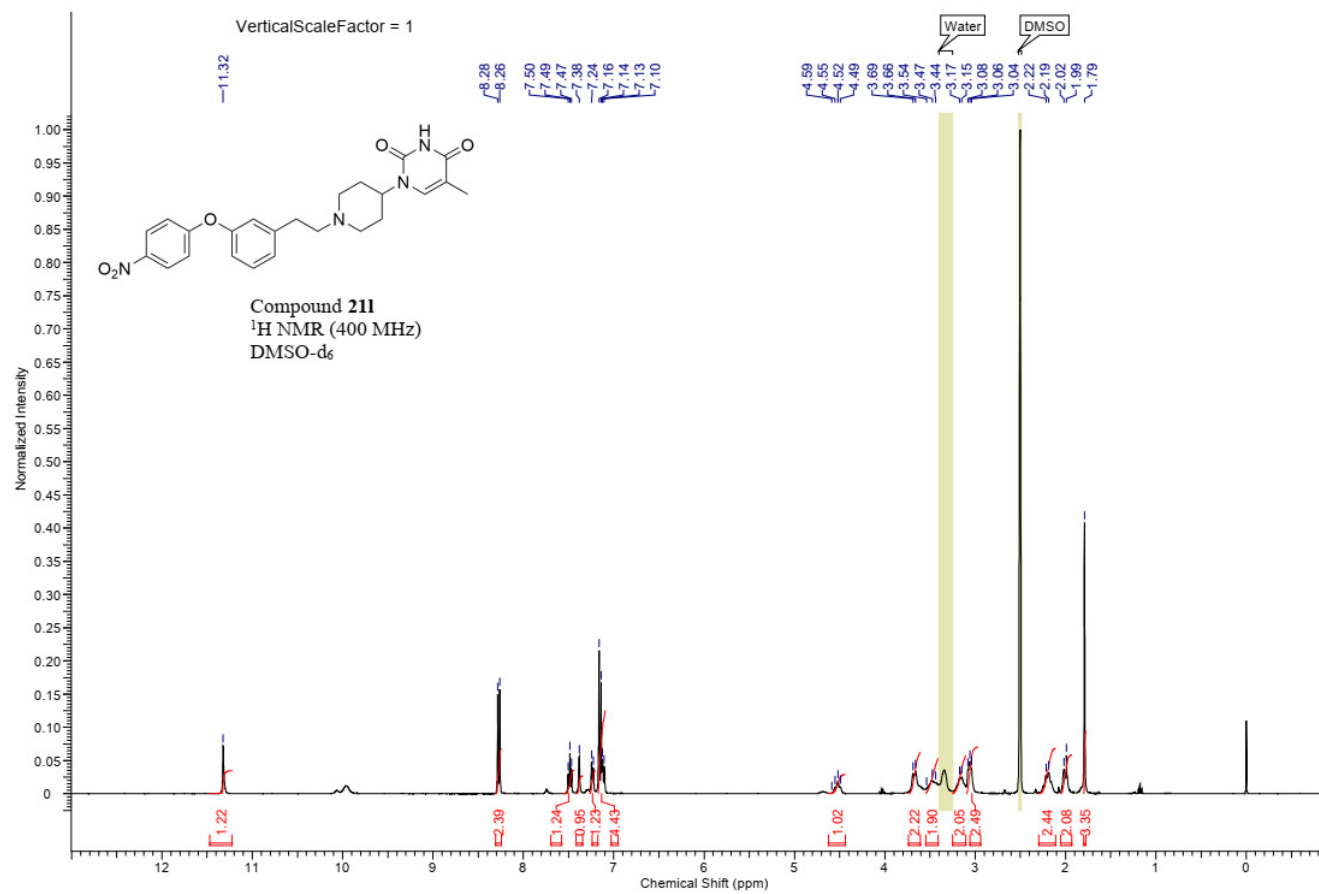Figure S25. <sup>1</sup>H NMR spectrum of compound 211.

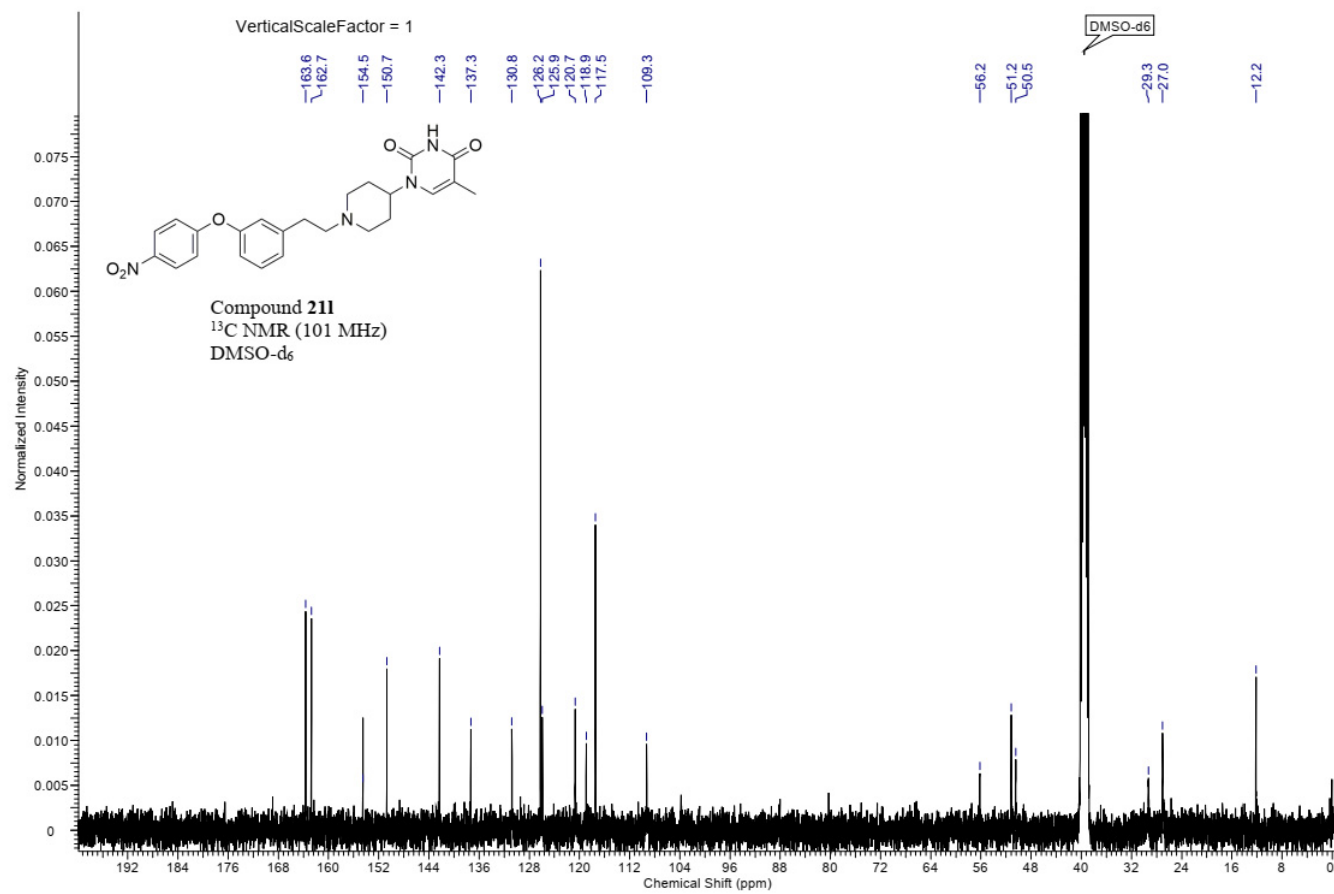

Figure S26.  $^{13}\text{C}$  NMR spectrum of compound 211.

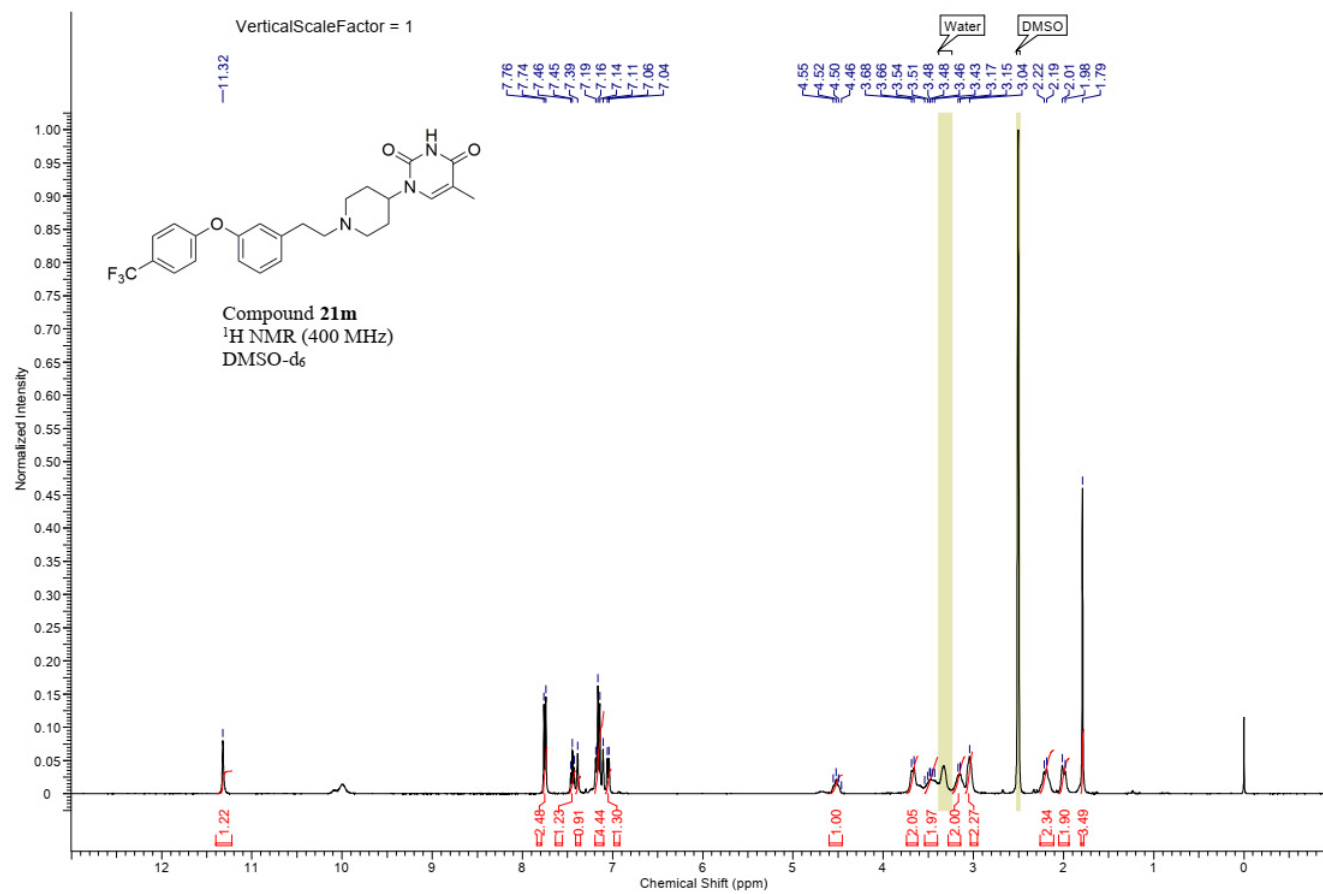Figure S27. <sup>1</sup>H NMR spectrum of compound **21m**.

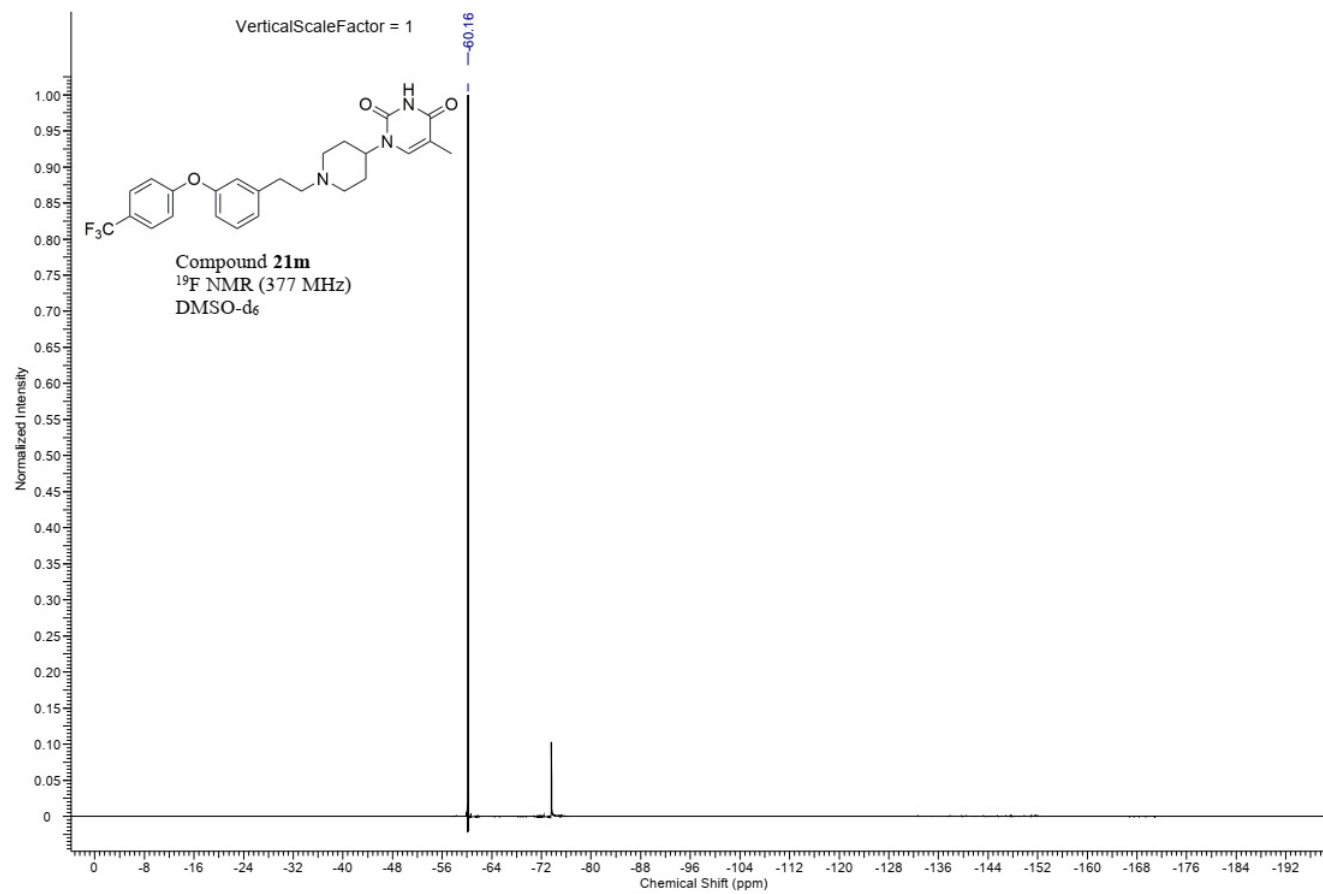

Figure S28. <sup>19</sup>F NMR spectrum of compound **21m**.

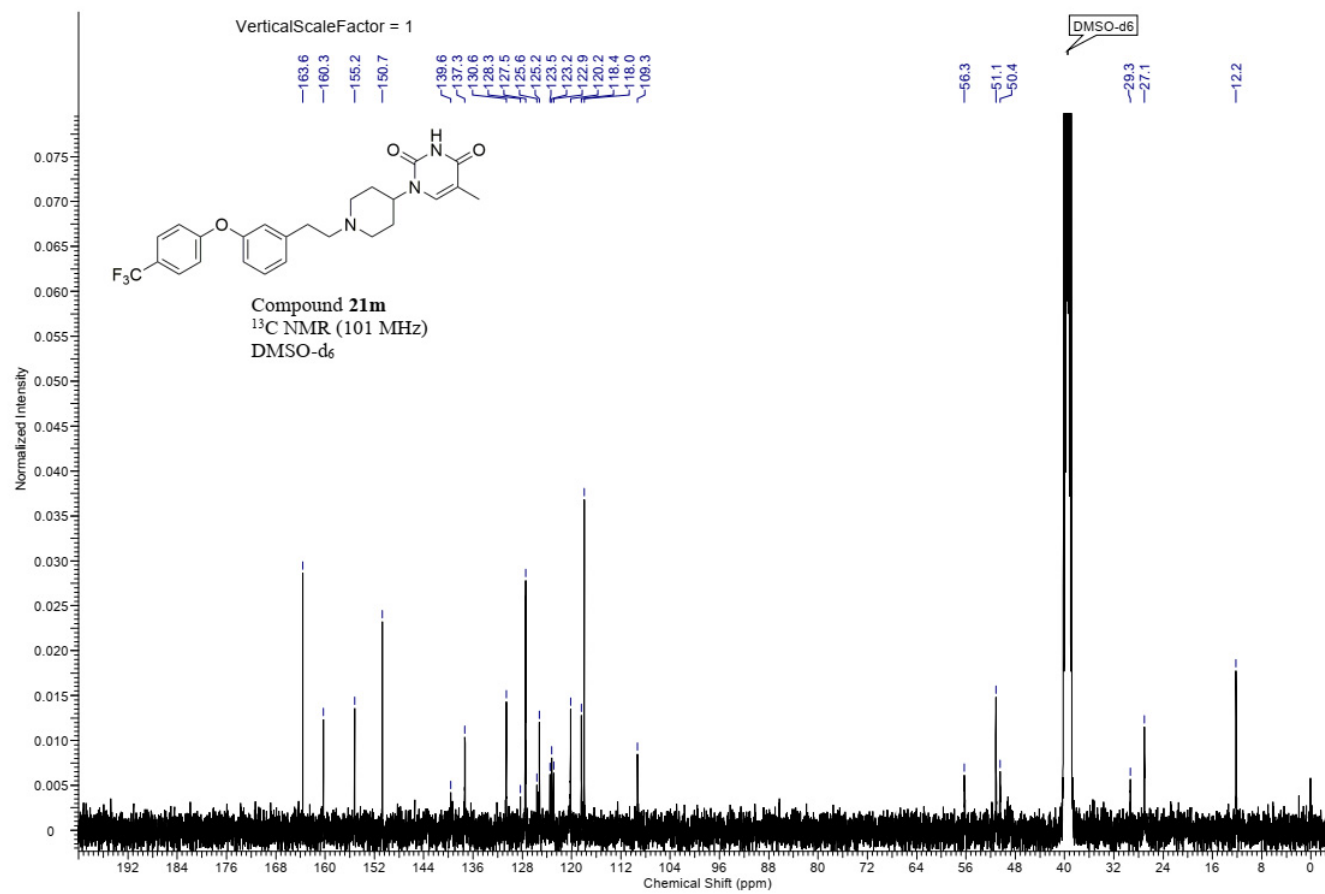Figure S29.  $^{13}\text{C}$  NMR spectrum of compound **21m**.

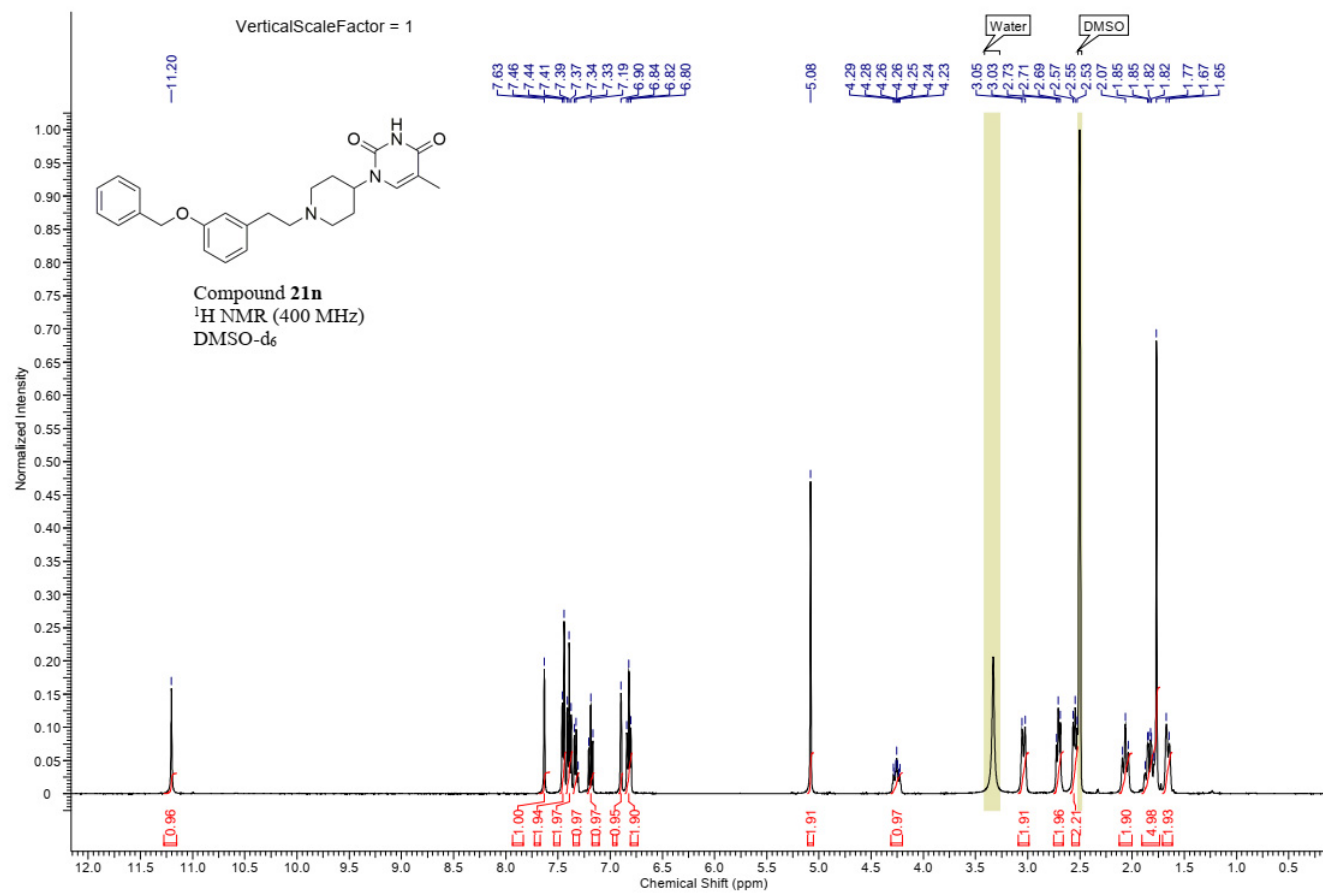Figure S30. <sup>1</sup>H NMR spectrum of compound **21n**.

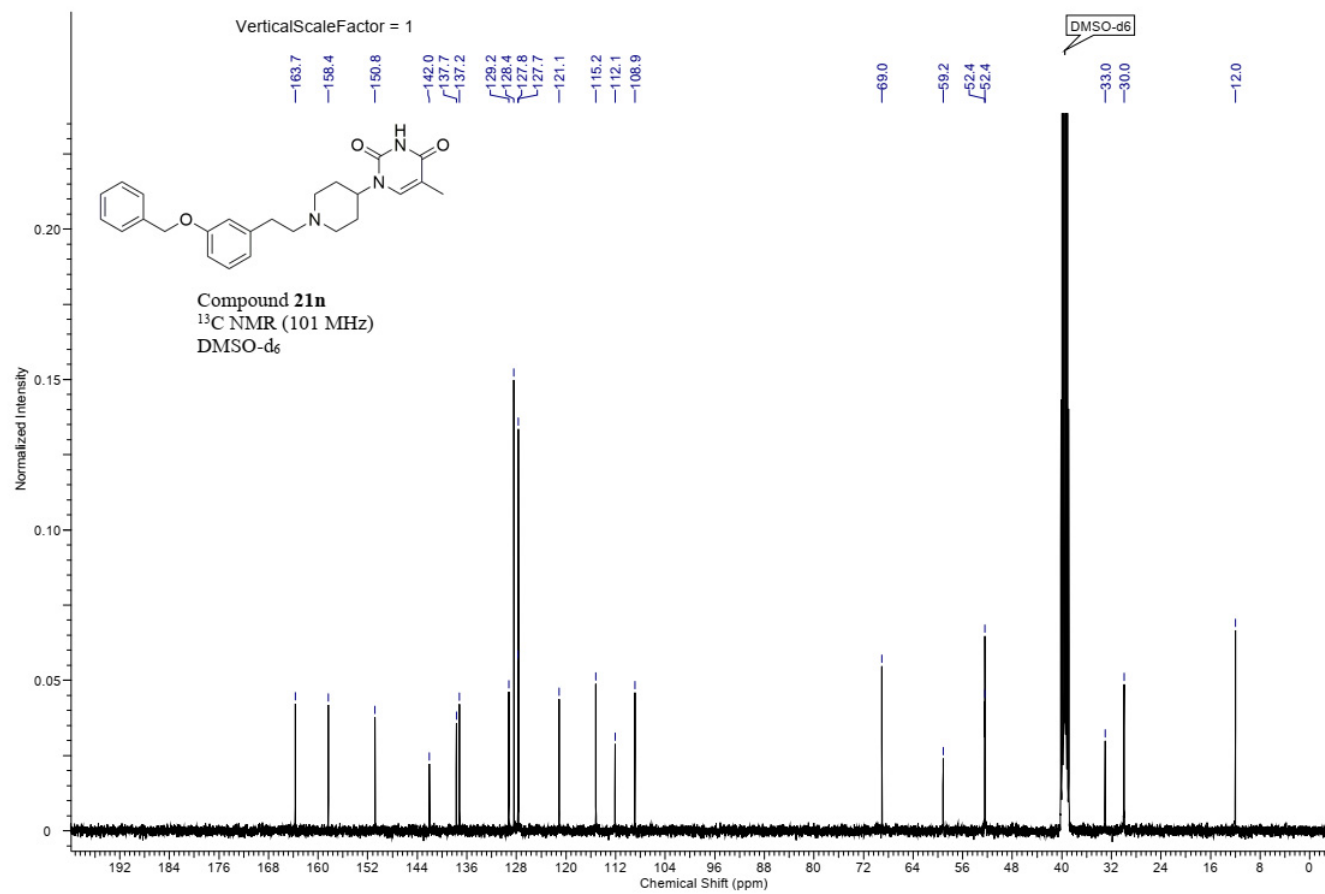

Figure S31.  $^{13}\text{C}$  NMR spectrum of compound 21n.



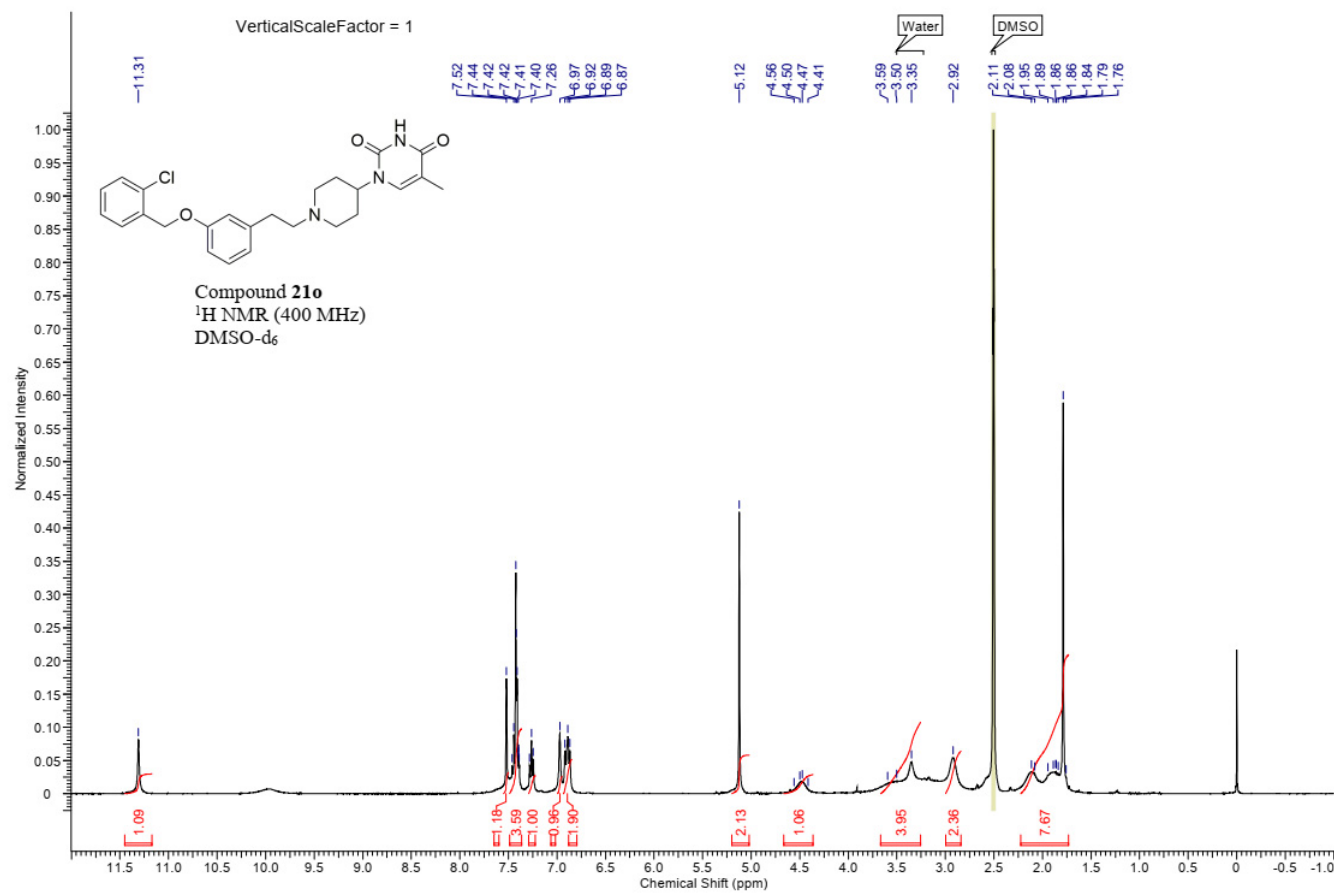Figure S32. <sup>1</sup>H NMR spectrum of compound 21o.

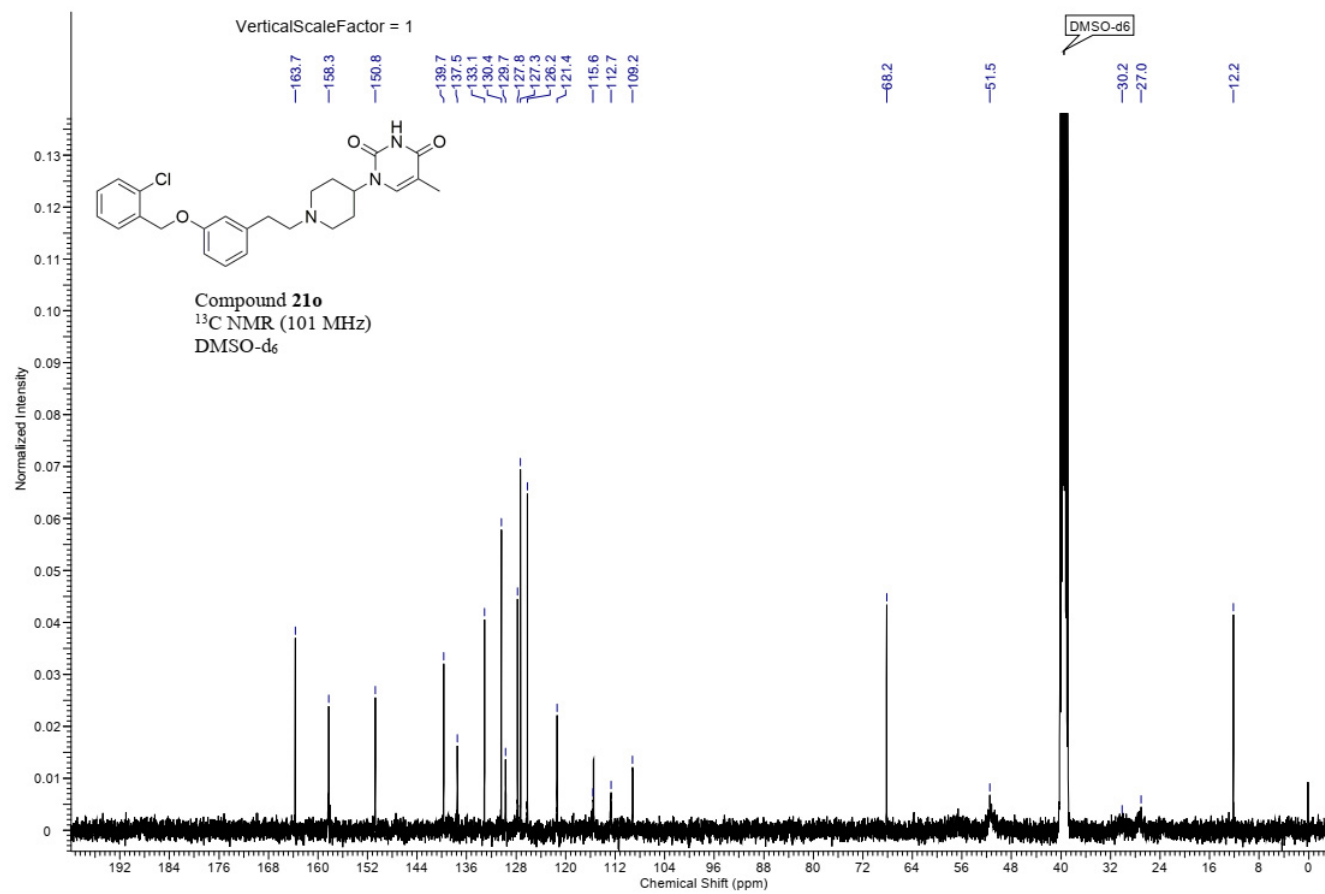

Figure S33.  $^{13}\text{C}$  NMR spectrum of compound **21o**.

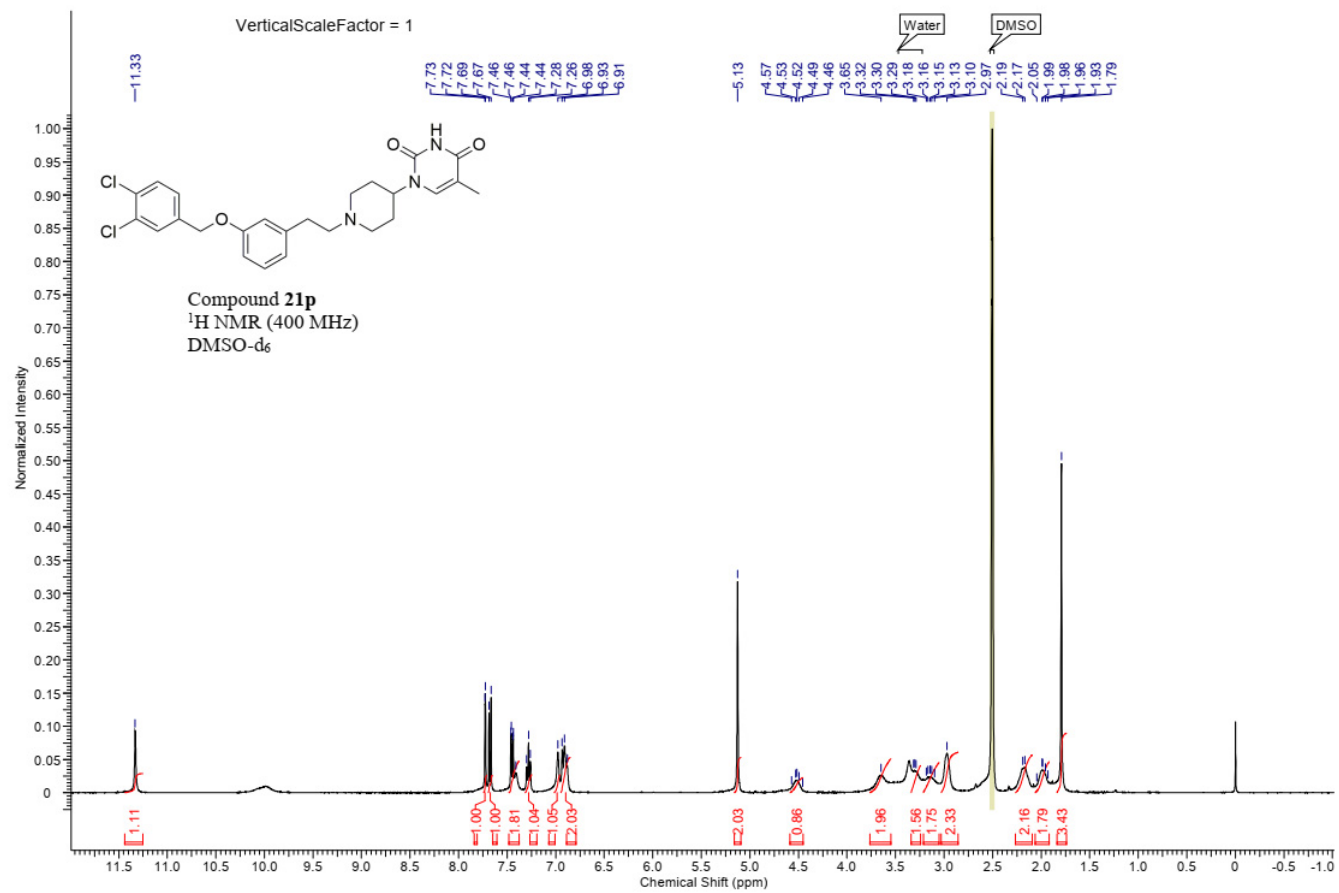Figure S34. <sup>1</sup>H NMR spectrum of compound 21p.

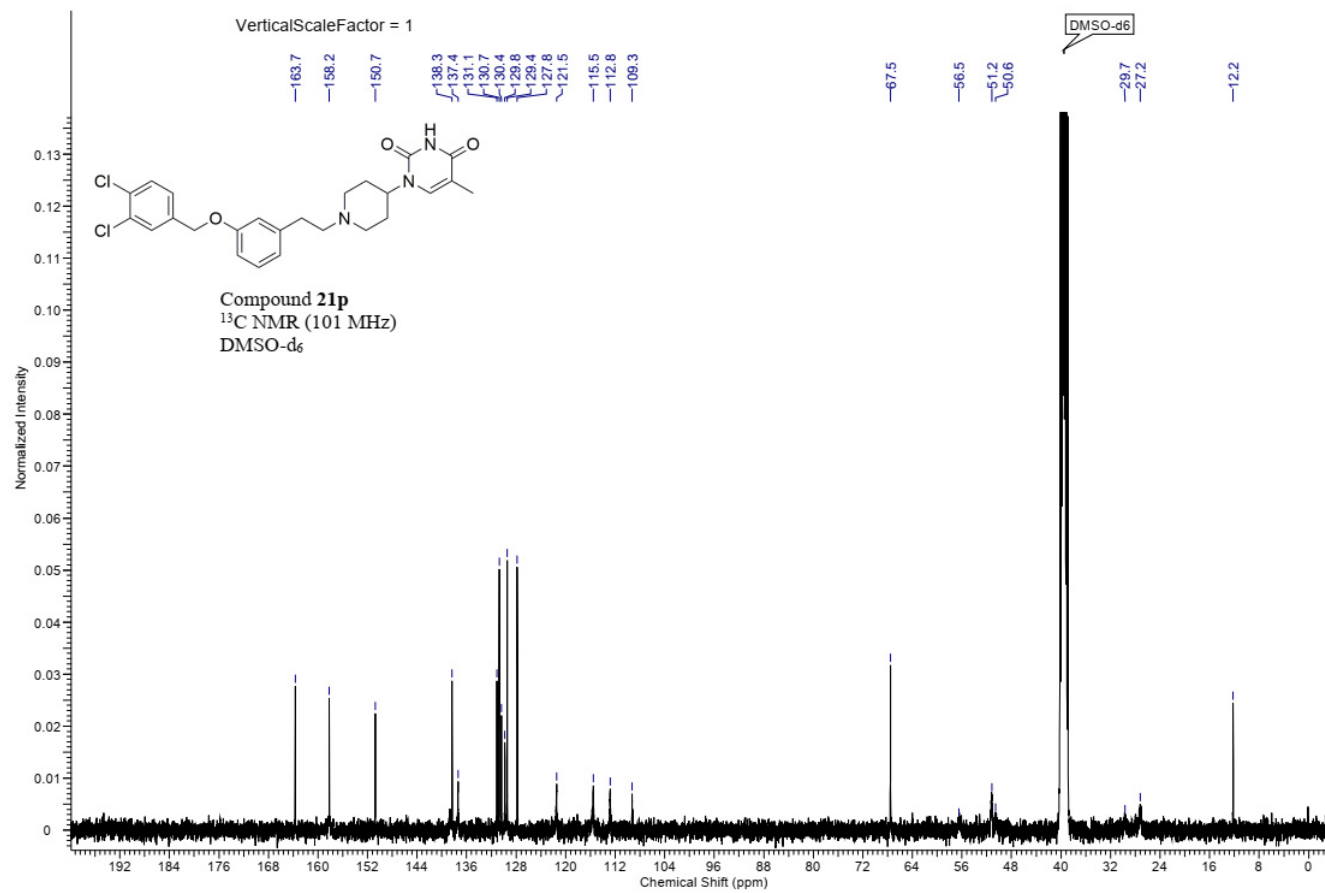Figure S35.  $^{13}\text{C}$  NMR spectrum of compound 21p.

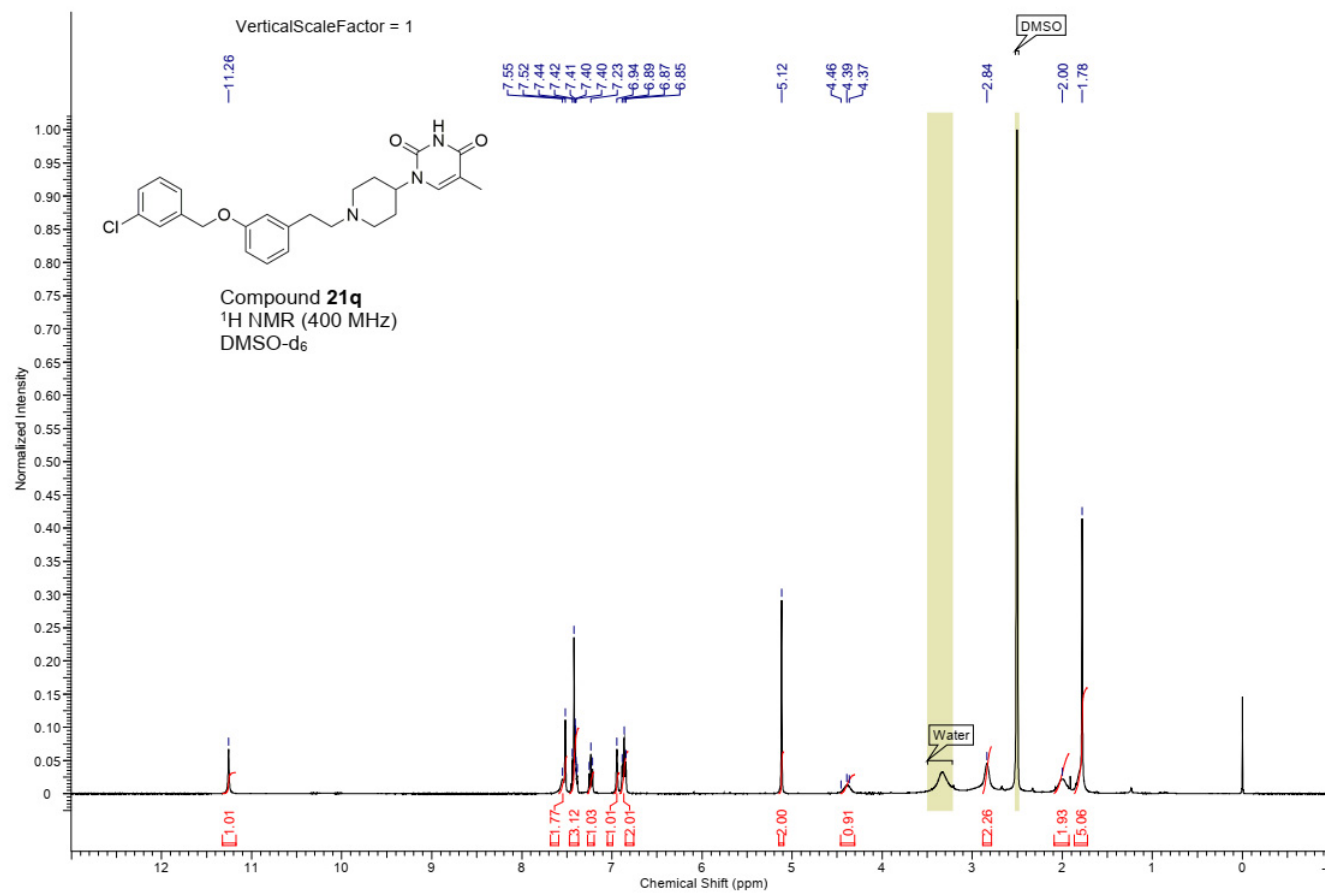Figure S36. <sup>1</sup>H NMR spectrum of compound **21q**.

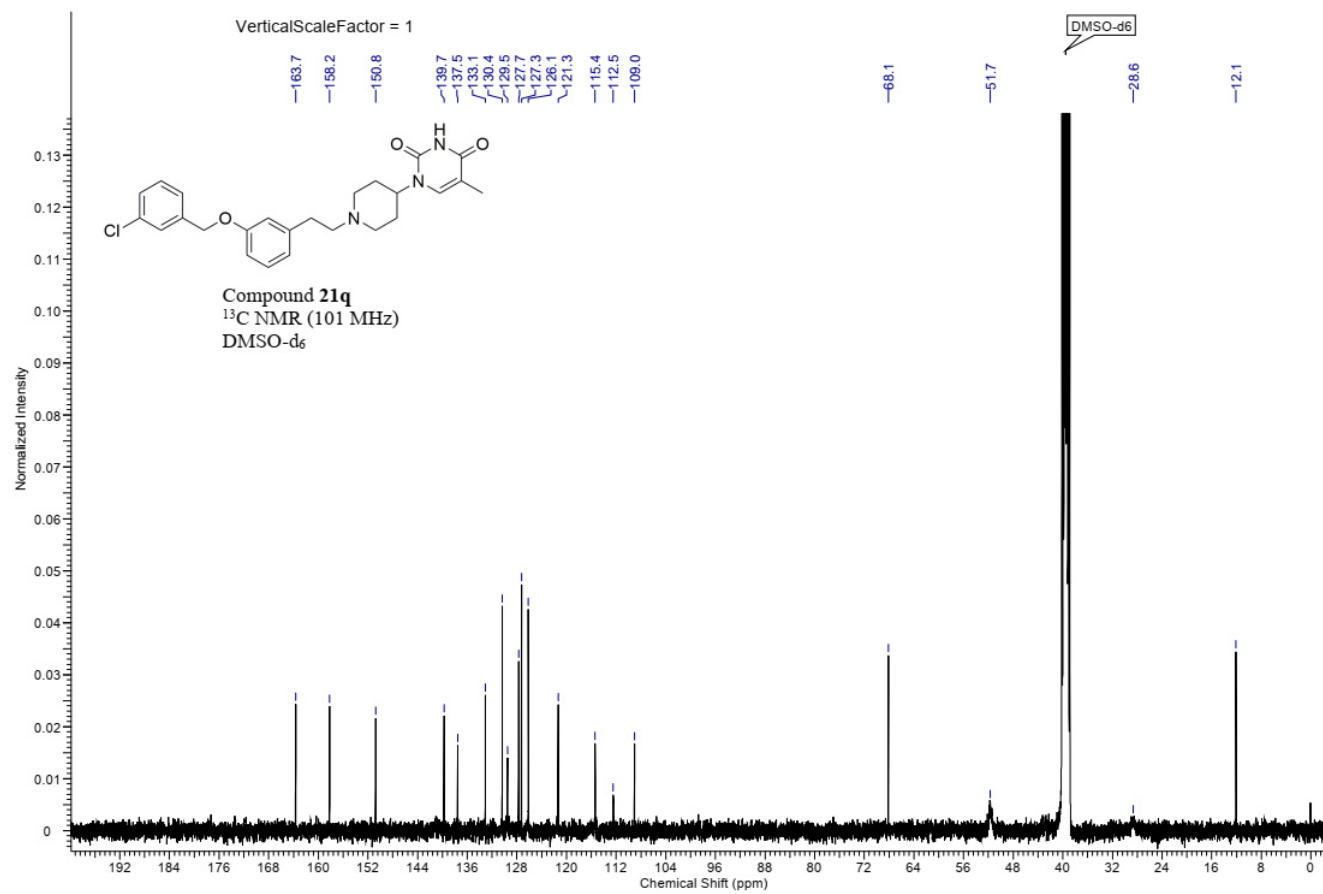Figure S37. <sup>13</sup>C NMR spectrum of compound 21q.

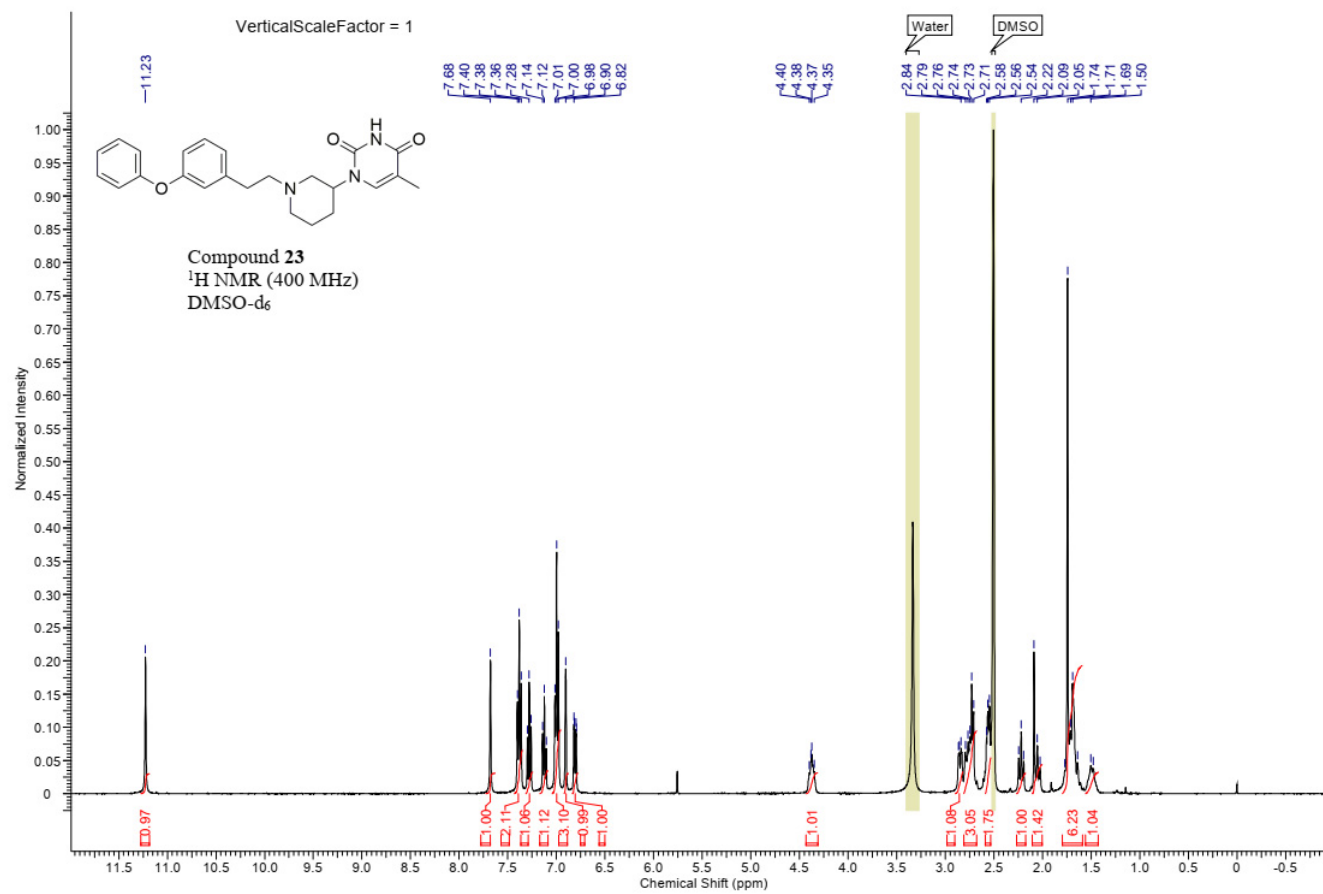Figure S38. <sup>1</sup>H NMR spectrum of compound **23**.

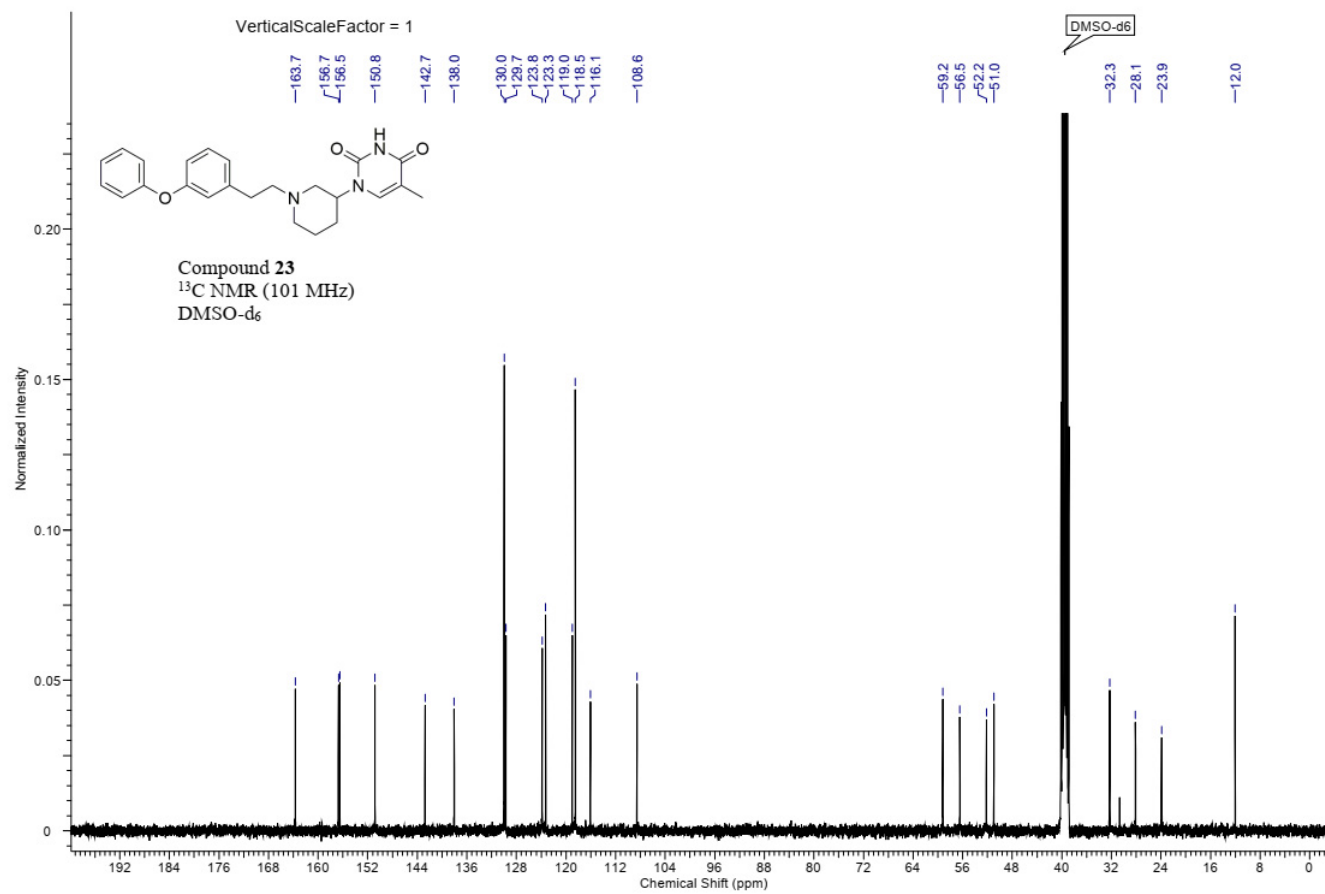Figure S39. <sup>13</sup>C NMR spectrum of compound 23.



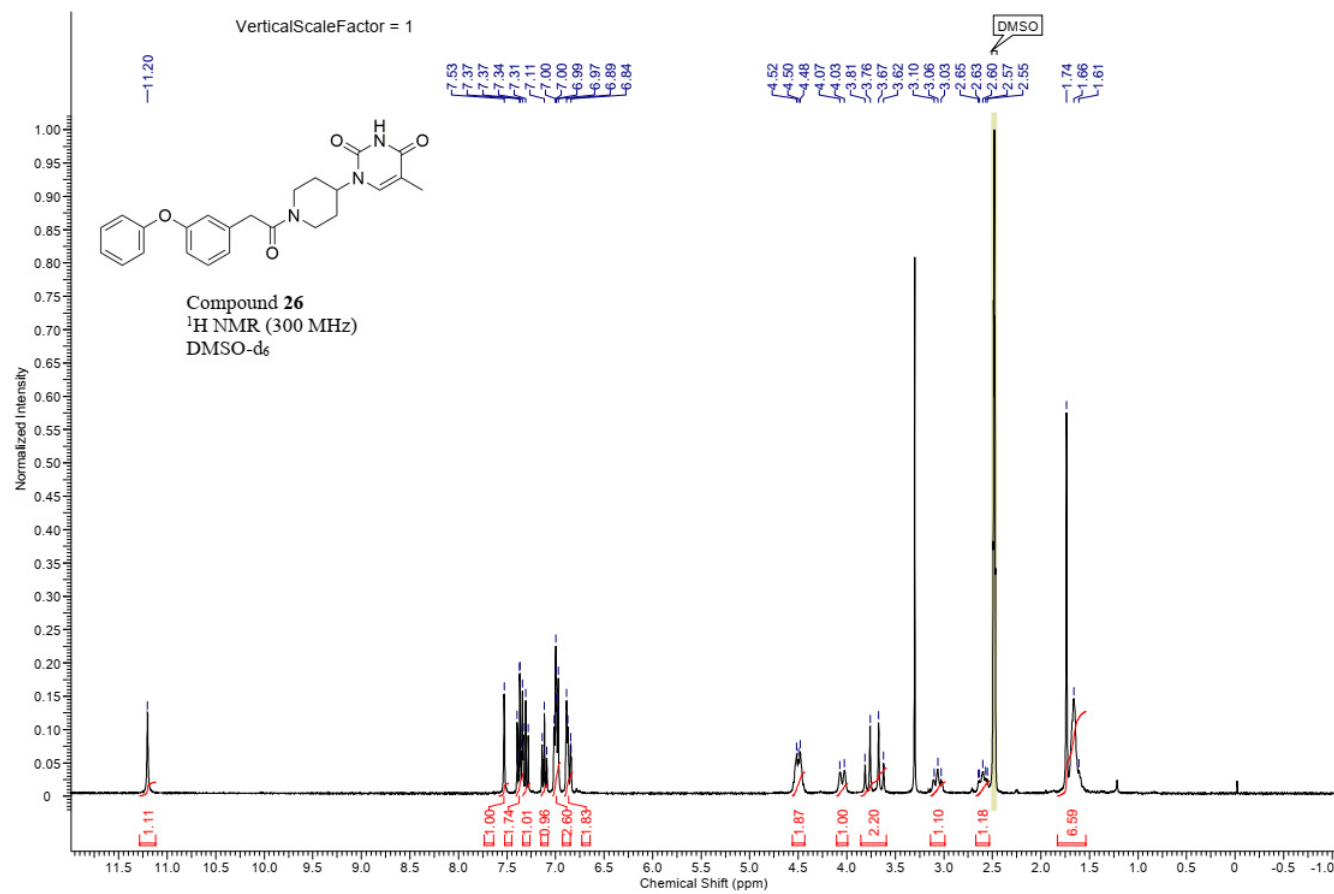Figure S40. <sup>1</sup>H NMR spectrum of compound 26.

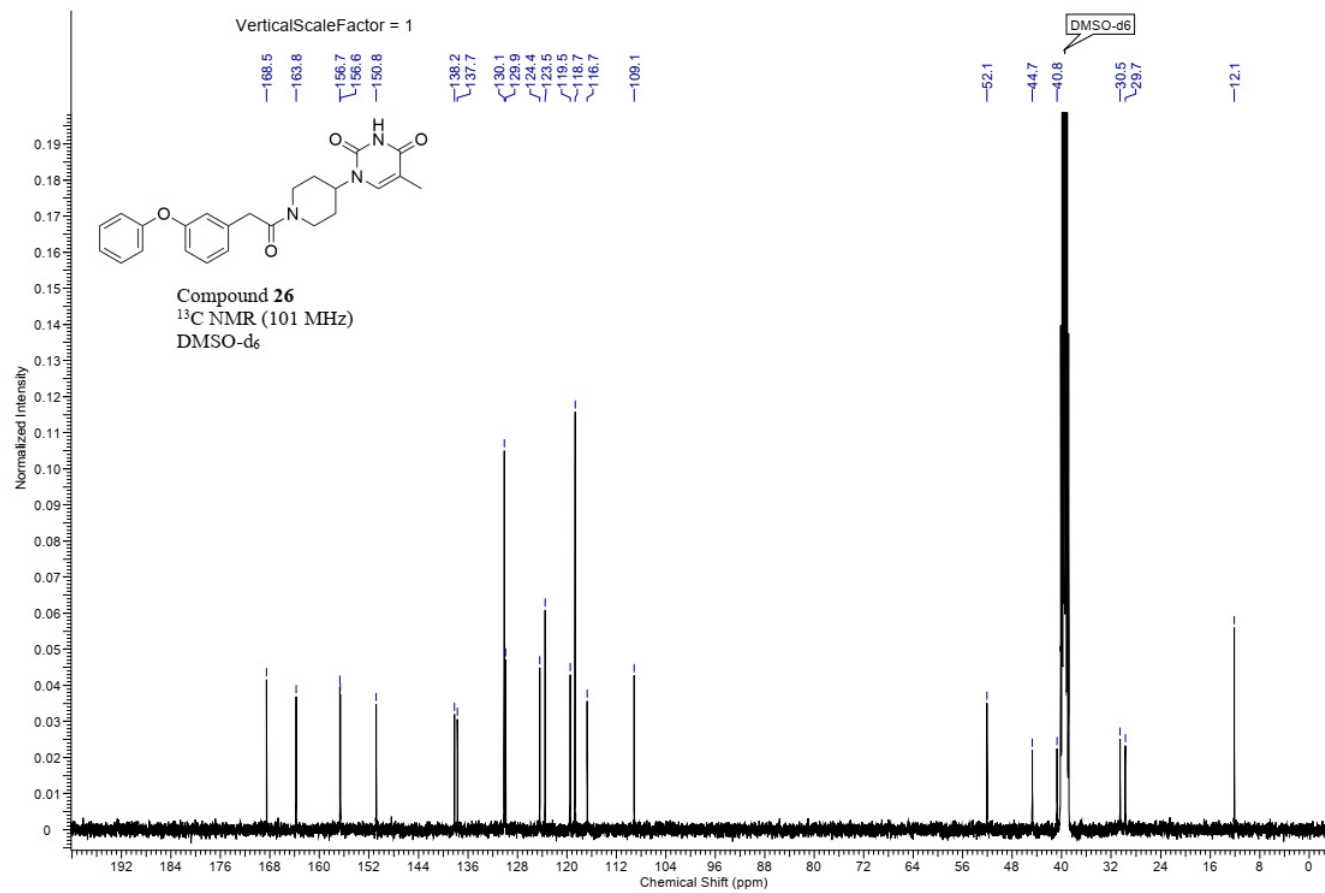Figure S41. <sup>13</sup>C NMR spectrum of compound 26.

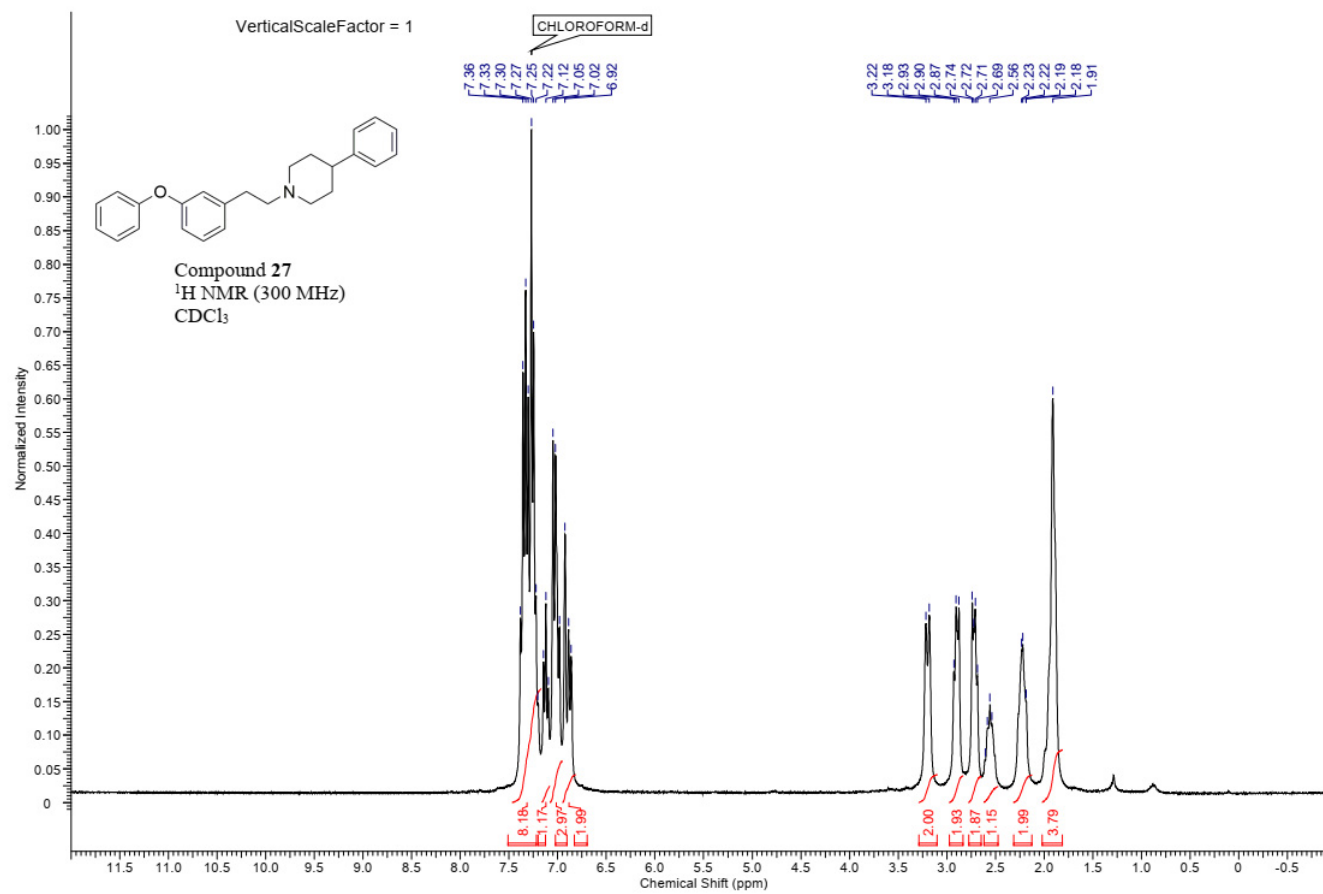Figure S42. <sup>1</sup>H NMR spectrum of compound 27.

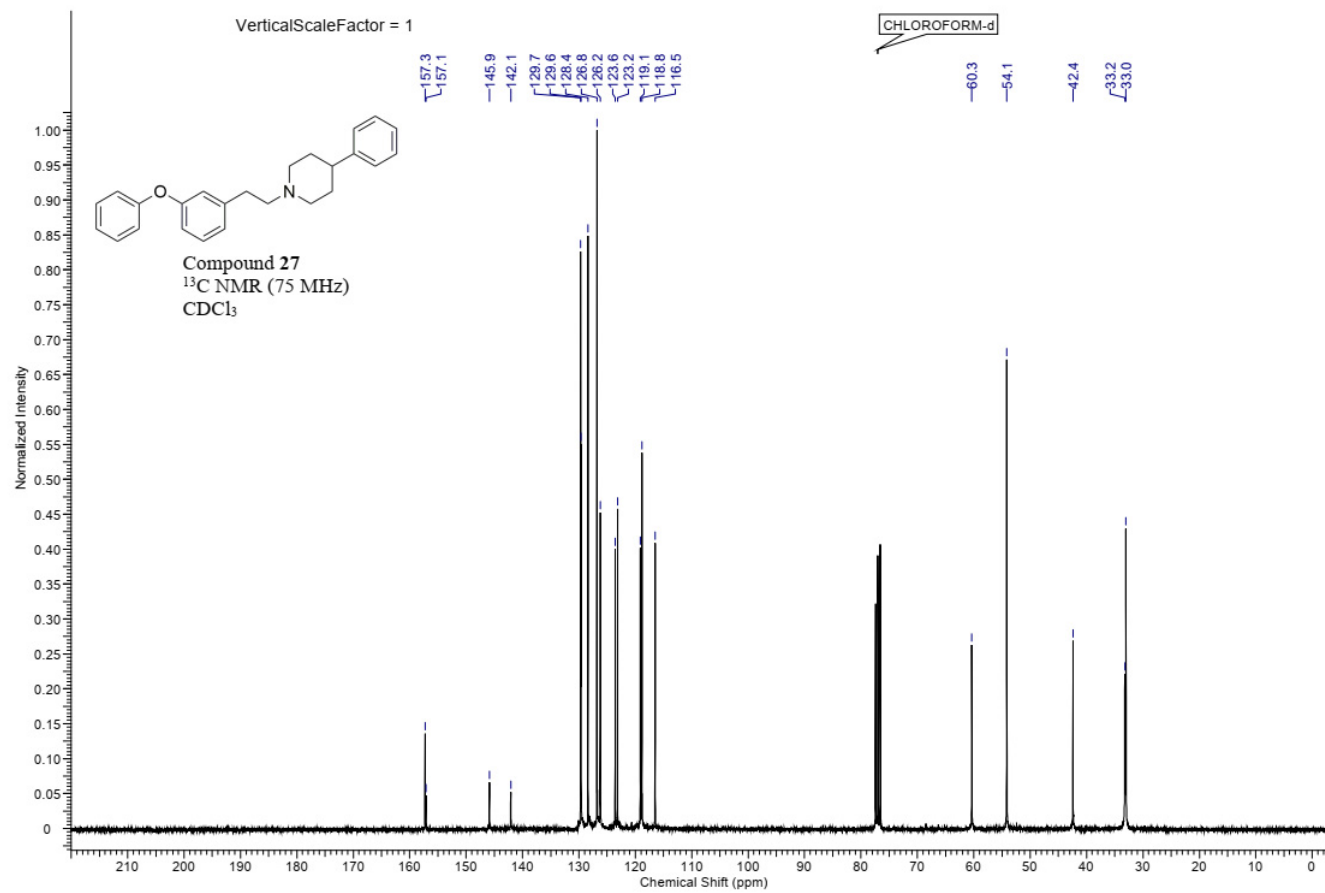Figure S43.  $^{13}\text{C}$  NMR spectrum of compound 27.

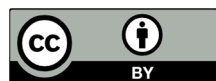

© 2020 by the authors. Licensee MDPI, Basel, Switzerland. This article is an open access article distributed under the terms and conditions of the Creative Commons Attribution (CC BY) license (<http://creativecommons.org/licenses/by/4.0/>).
